# Supplementary material for: DFT Calculations of 1H NMR Chemical Shifts of Geometric Isomers of Conjugated Linolenic Acids, Hexadecatrienyl Pheromones, and Model Triene-Containing Compounds: Structures in Solution and Revision of NMR Assignments
Source: MDPI journal article supplement (doi:10.3390/molecules26113477), 2021-06-07
Supplement: s1 [file s1]

# DFT Calculations of $^1\text{H}$ NMR Chemical Shifts of Geometric Isomers of Conjugated Linolenic Acids, Hexadecatrienyl Pheromones, and Model Triene-Containing Compounds: Structures in Solution and Revision of NMR Assignments

Themistoklis Venianakis, Christina Oikonomaki, Michael G. Siskos \*, Alexandra Primikyri and Ioannis P. Gerothanassis \*

Section of Organic Chemistry and Biochemistry, Department of Chemistry, University of Ioannina, GR-45110 Ioannina, Greece; t.venianakis@uoi.gr (T.V.); pch01328@uoi.gr (C.O.); a.primikyri@uoi.gr (A.P.)

\* Correspondence: msiskos@uoi.gr (M.G.S.); igeroth@uoi.gr (I.P.G.)

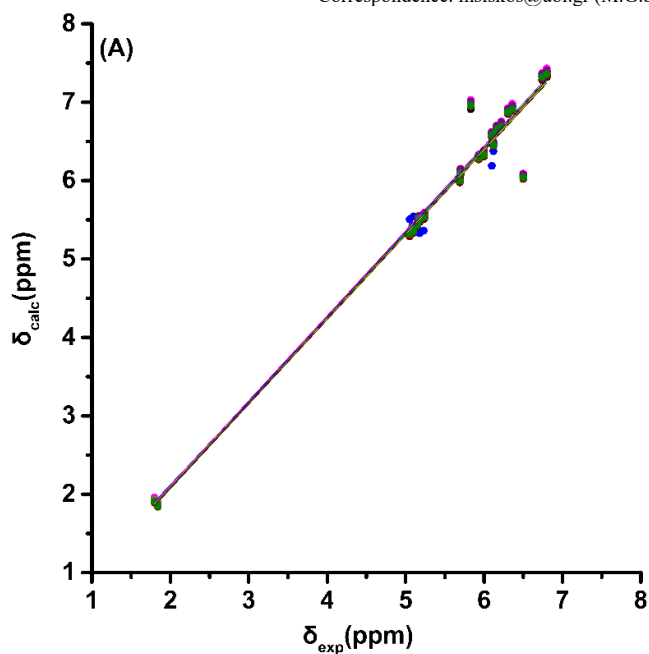

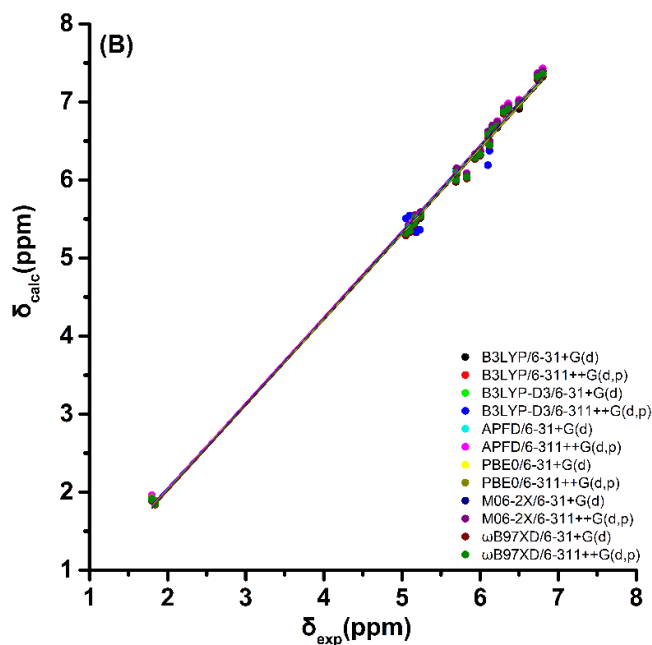

**Figure S1. (A)** Calculated,  $\delta_{\text{calc}}$ ,  $^1\text{H}$ -NMR chemical shifts of the olefinic protons (at the GIAO/B3LYP/6-311+G(2d,p) level of theory with CPCM) vs. experimental,  $\delta_{\text{exp}}$ , chemical shifts with energy minimization using various functionals and basis sets for the model trienyl compounds (*Z*)-1,3,5-hexatriene, (*E*)-1,3,5-hexatriene, (*E,Z,E*)-2,4,6-octatriene and (*E,E,E*)-2,4,6-octatriene. **(B)** As in (A), but the literature experimental values of  $\delta(\text{H}(3,6)) = 5.83$  ppm and  $\delta(\text{H}(4,5)) = 6.50$  ppm, of (*E,Z,E*)-2,4,6-octatriene [23] have been reversed.

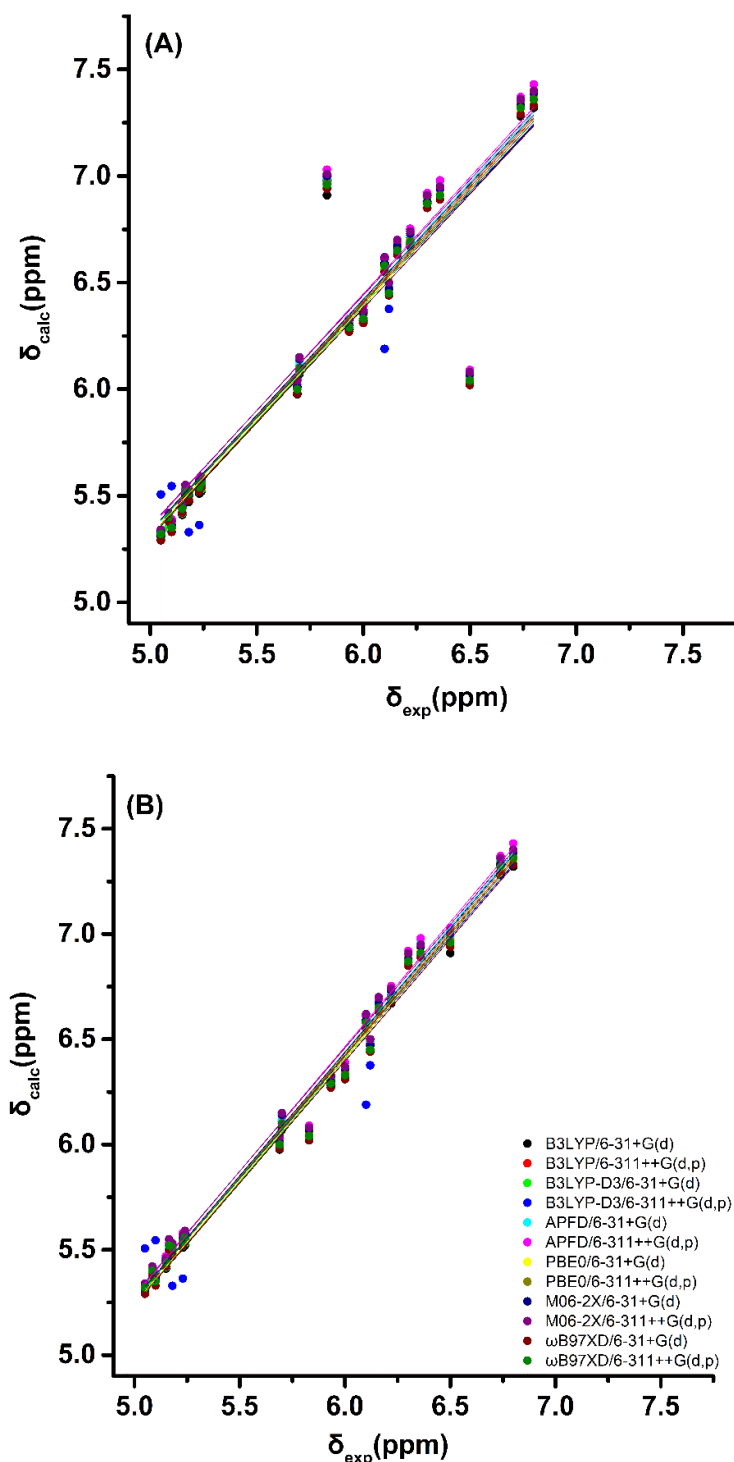

**Figure S2.** (A) Calculated,  $\delta_{\text{calc}}$ ,  $^1\text{H}$ -NMR chemical shifts at the GIAO/B3LYP/6-311+G(2d,p) level of theory with CPCM) of the olefinic protons vs. experimental,  $\delta_{\text{exp}}$ , chemical shifts with energy minimization using various functionals and basis sets for the model trienyl compounds (*Z*)-1,3,5-hexatriene, (*E*)-1,3,5-hexatriene, (*E,Z,E*)-2,4,6-octatriene and (*E,E,E*)-2,4,6-octatriene. (B) as in (A), but the literature experimental values of  $\delta(\text{H}(3,6)) = 5.83$  ppm and  $\delta(\text{H}(4,5)) = 6.50$  ppm, of (*E,Z,E*)-2,4,6-octatriene [23] have been reversed.

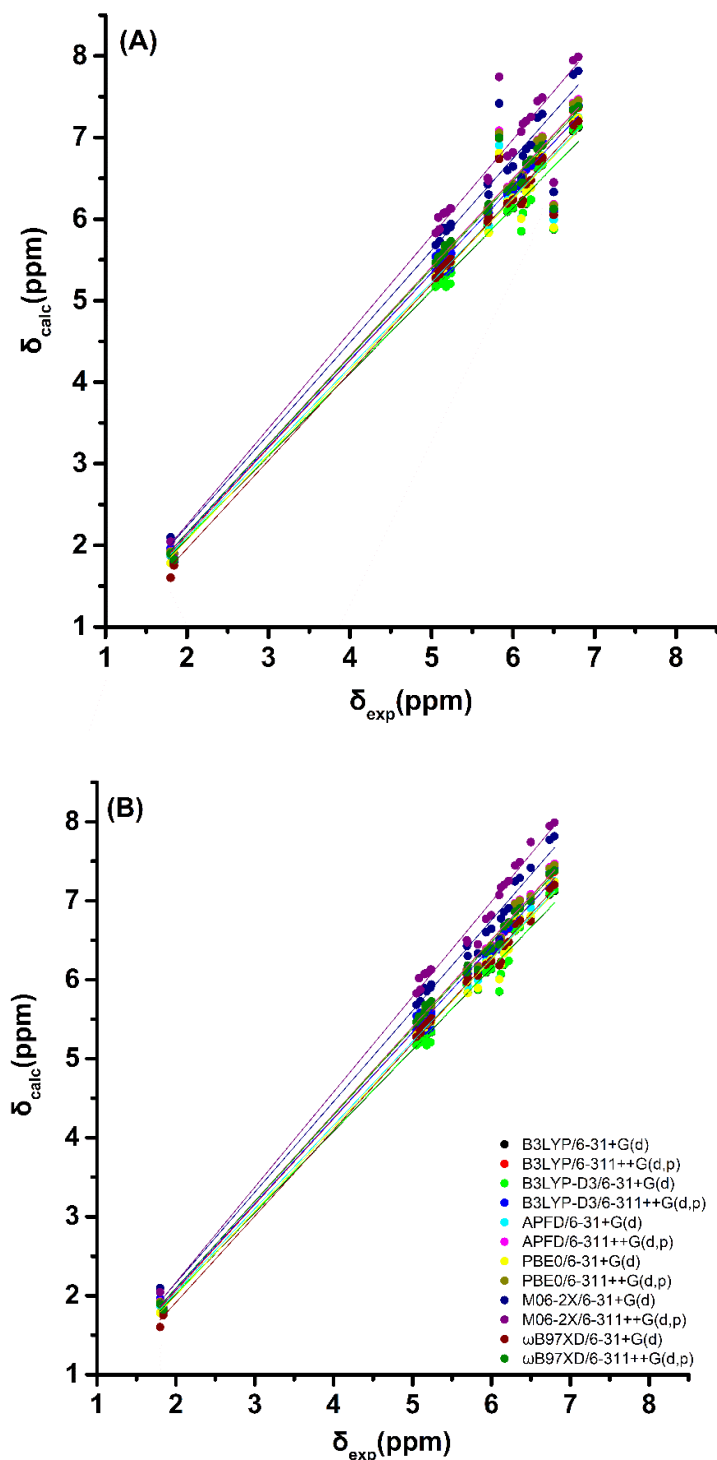

**Figure S3.** (A) Calculated,  $\delta_{\text{calc}}$ ,  $^1\text{H}$ -NMR chemical shifts of the olefinic protons (with CPCM) vs. experimental,  $\delta_{\text{exp}}$ , chemical shifts using the same level of theory as geometry optimization for the model trienyl compounds (*Z*)-1,3,5-hexatriene, (*E*)-1,3,5-hexatriene, (*E,Z,E*)-2,4,6-octatriene and (*E,E,E*)-2,4,6-octatriene. (B) As in (A), but the literature experimental values of  $\delta(\text{H}(3,6)) = 5.83$  ppm and  $\delta(\text{H}(4,5)) = 6.50$  ppm, of (*E,Z,E*)-2,4,6-octatriene [23] have been reversed.

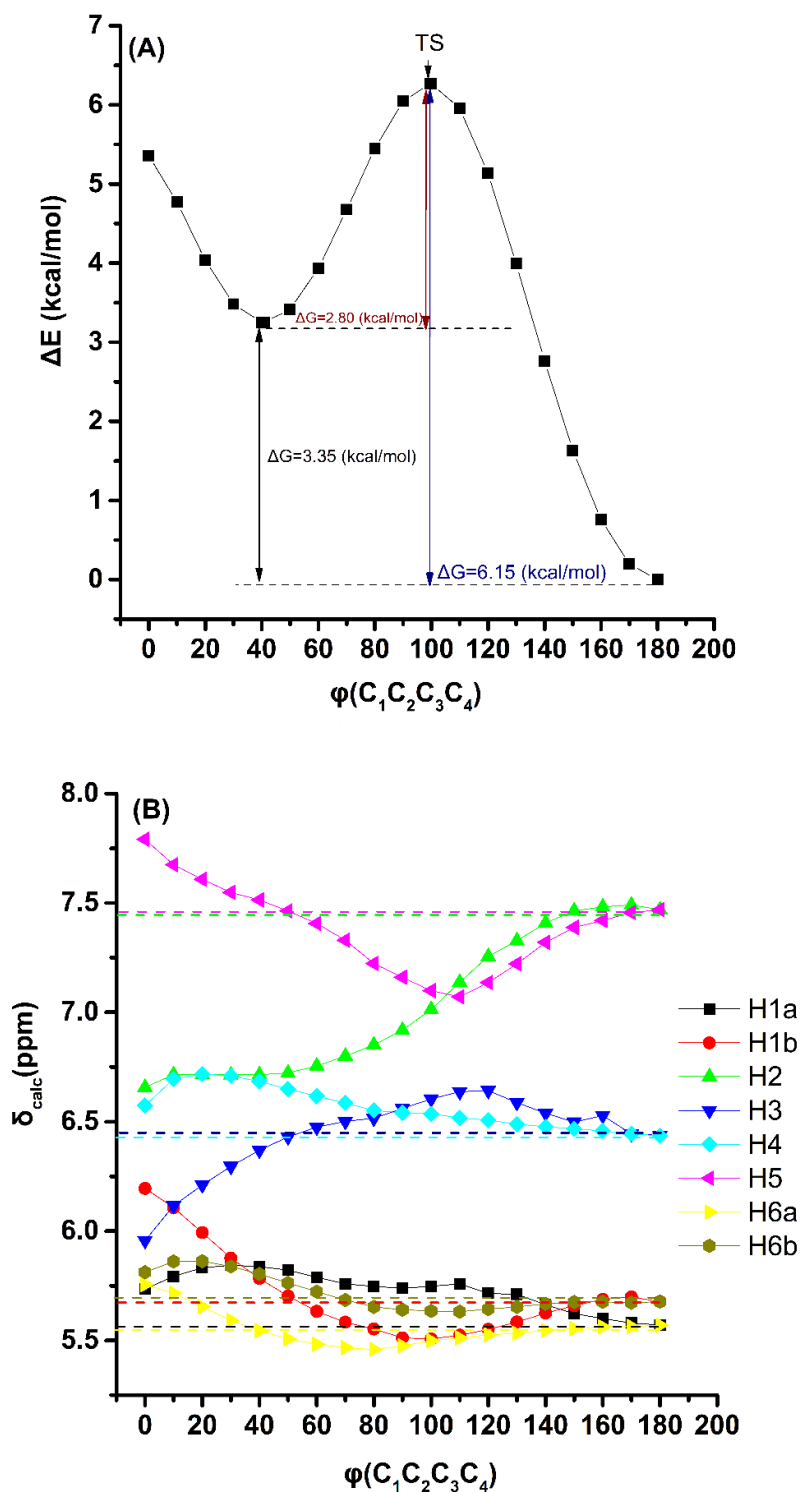

**Figure S4.** Effect of variation of the torsion angle  $\phi$  (C<sub>1</sub>C<sub>2</sub>C<sub>3</sub>C<sub>4</sub>) of (Z)-1,3,5-hexatriene, on the electronic energy  $\Delta E$  (kcal/mol) (characteristic  $\Delta G$  values are also shown) (A), and computational  $^1\text{H}$ -NMR chemical shifts with CPCM in CHCl<sub>3</sub> of the olefinic protons using the same level of theory as energy minimization (APFD/6-311++G(d,p)) (B). The experimental chemical shift values are denoted with the horizontal dotted lines.

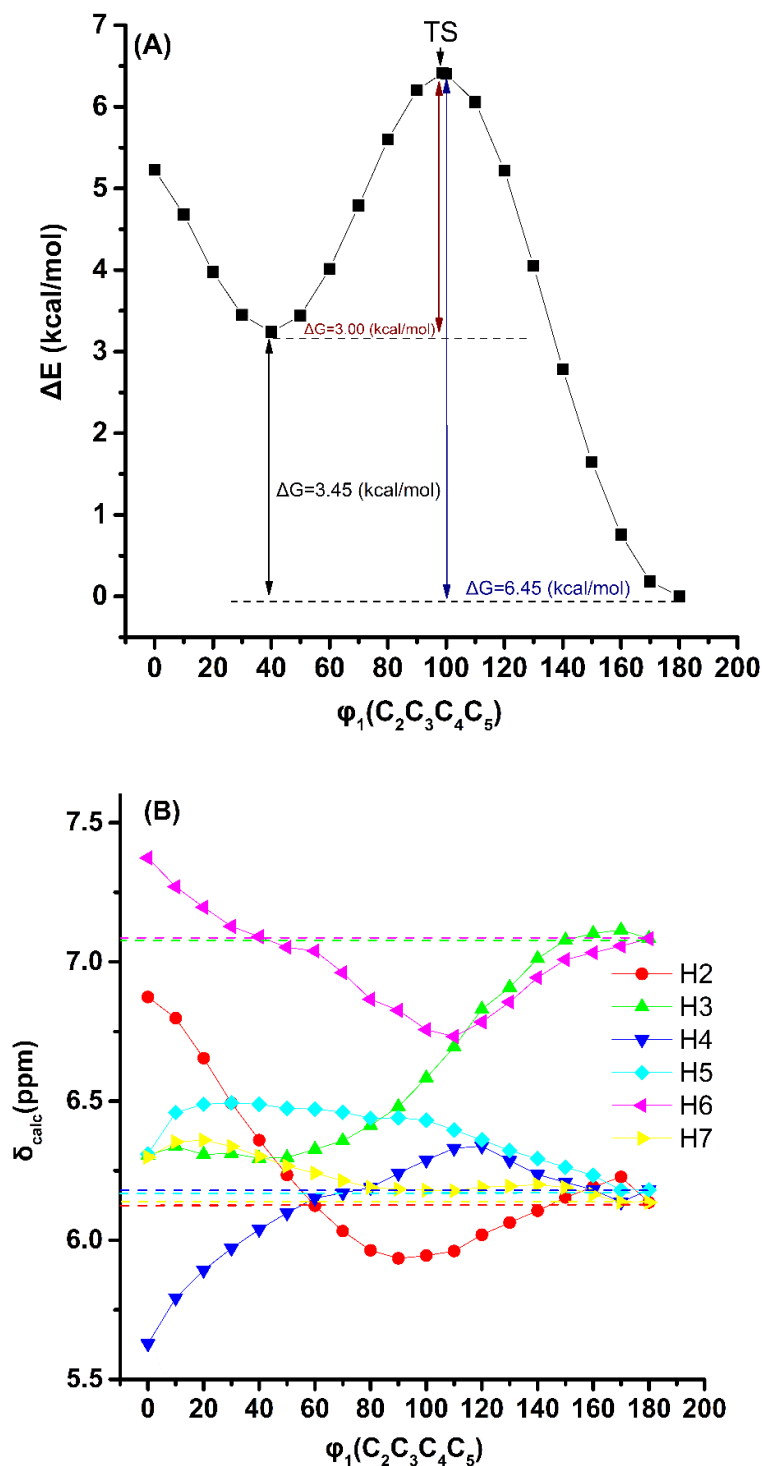

**Figure S5.** Effect of variation of the torsion angle  $\phi_1(\text{C}_2\text{C}_3\text{C}_4\text{C}_5)$  of  $(E,Z,E)$ -2,4,6-octatriene, on the electronic energy  $\Delta E$  (kcal/mol) (characteristic  $\Delta G$  values are also shown) (A) and computational olefinic  $^1\text{H}$ -NMR chemical shifts with CPCM in  $\text{CHCl}_3$  using the same level of theory as energy minimization (APFD/6-31++G(d,p)) (B). The experimental chemical shift values are denoted with the horizontal dotted lines.

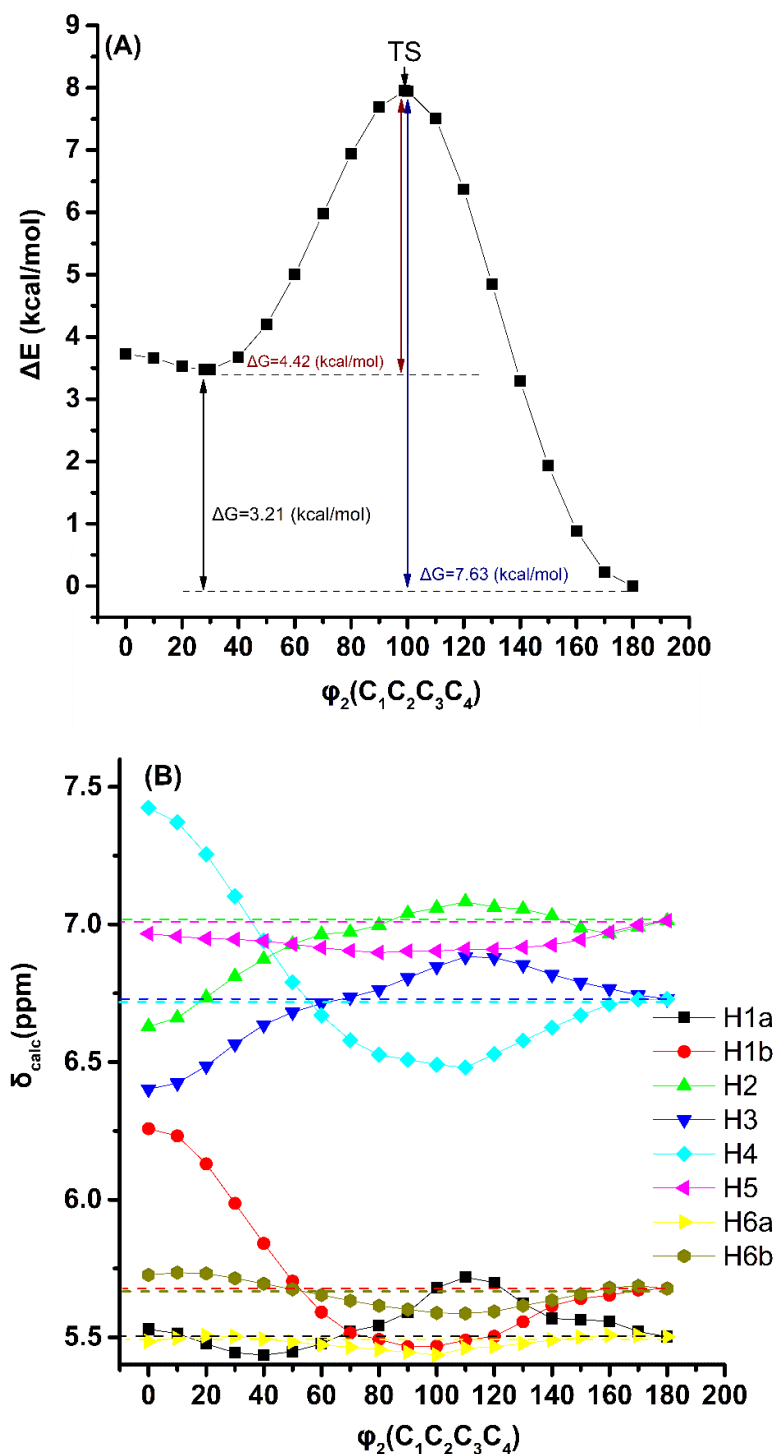

**Figure S6.** Effect of variation of the torsion angle  $\phi_2(C_1C_2C_3C_4)$  of (E)-1,3,5-hexatriene, on the electronic energy  $\Delta E$  (kcal/mol) (characteristic  $\Delta G$  values are also shown) (A) and computational olefinic  $^1\text{H}$ -NMR chemical shifts with CPCM in  $\text{CHCl}_3$  using the same level of theory as energy minimization (APFD/6-31++G(d,p)) (B). The experimental chemical shift values are denoted with the horizontal dotted lines.

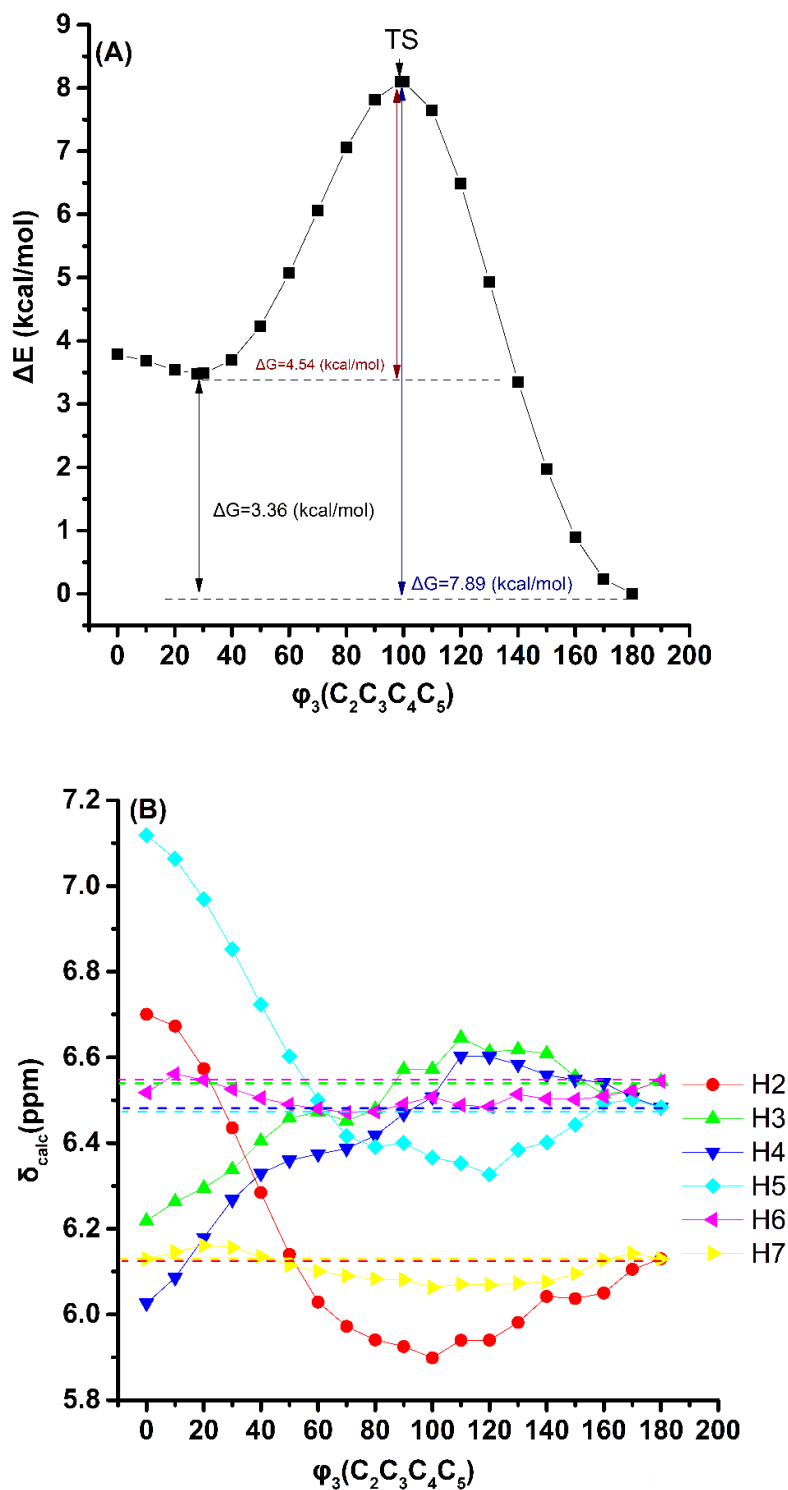

**Figure S7.** Effect of variation of the torsion angle  $\phi_3$  (C<sub>2</sub>C<sub>3</sub>C<sub>4</sub>C<sub>5</sub>) of (E,E,E)-2,4,6-octatriene, on the electronic energy  $\Delta E$  (kcal/mol) (characteristic  $\Delta G$  values are also shown) (A) and <sup>1</sup>H-NMR chemical shifts with CPCM in CCl<sub>4</sub> using the same level of theory as energy minimization (APFD/6-31++G(d,p)) (B). The experimental chemical shift values are denoted with the horizontal dotted lines.



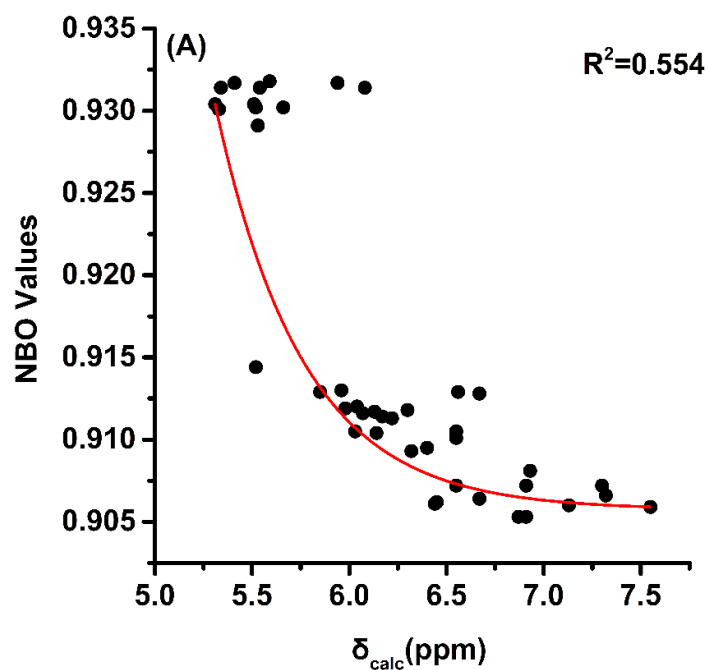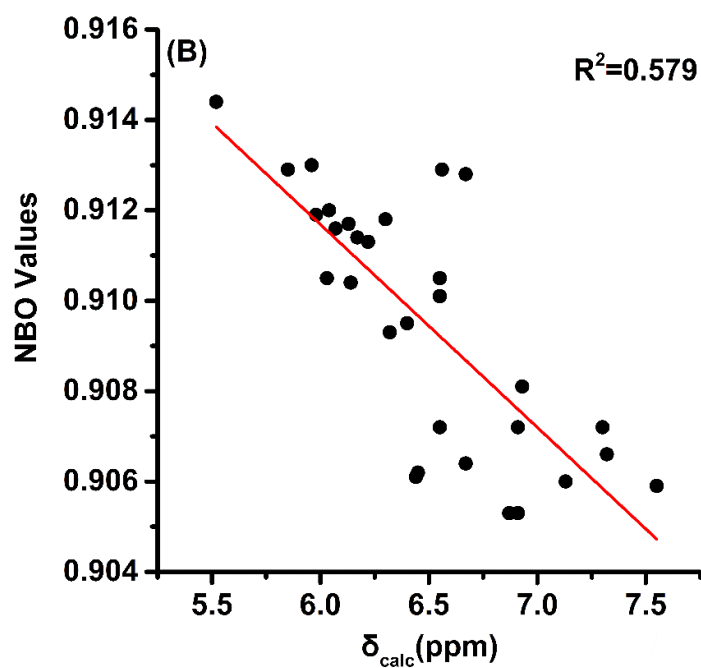

**Figure S8.** (A) NBO bond order of the olefinic C-H bonds of the model compounds (*Z*)-1,3,5- hexatriene, (*E*)-1,3,5- hexatriene, (*E,Z,E*)-2,4,6-octatriene, (*E,E,E*)-2,4,6-octatriene vs. calculated,  $\delta_{\text{calc}}$ ,  $^1\text{H}$ -NMR chemical shifts at the B3LYP/6-31+G(d) level. (B) As in (A), however, the terminal  $\text{CH}_2$  protons have been omitted.

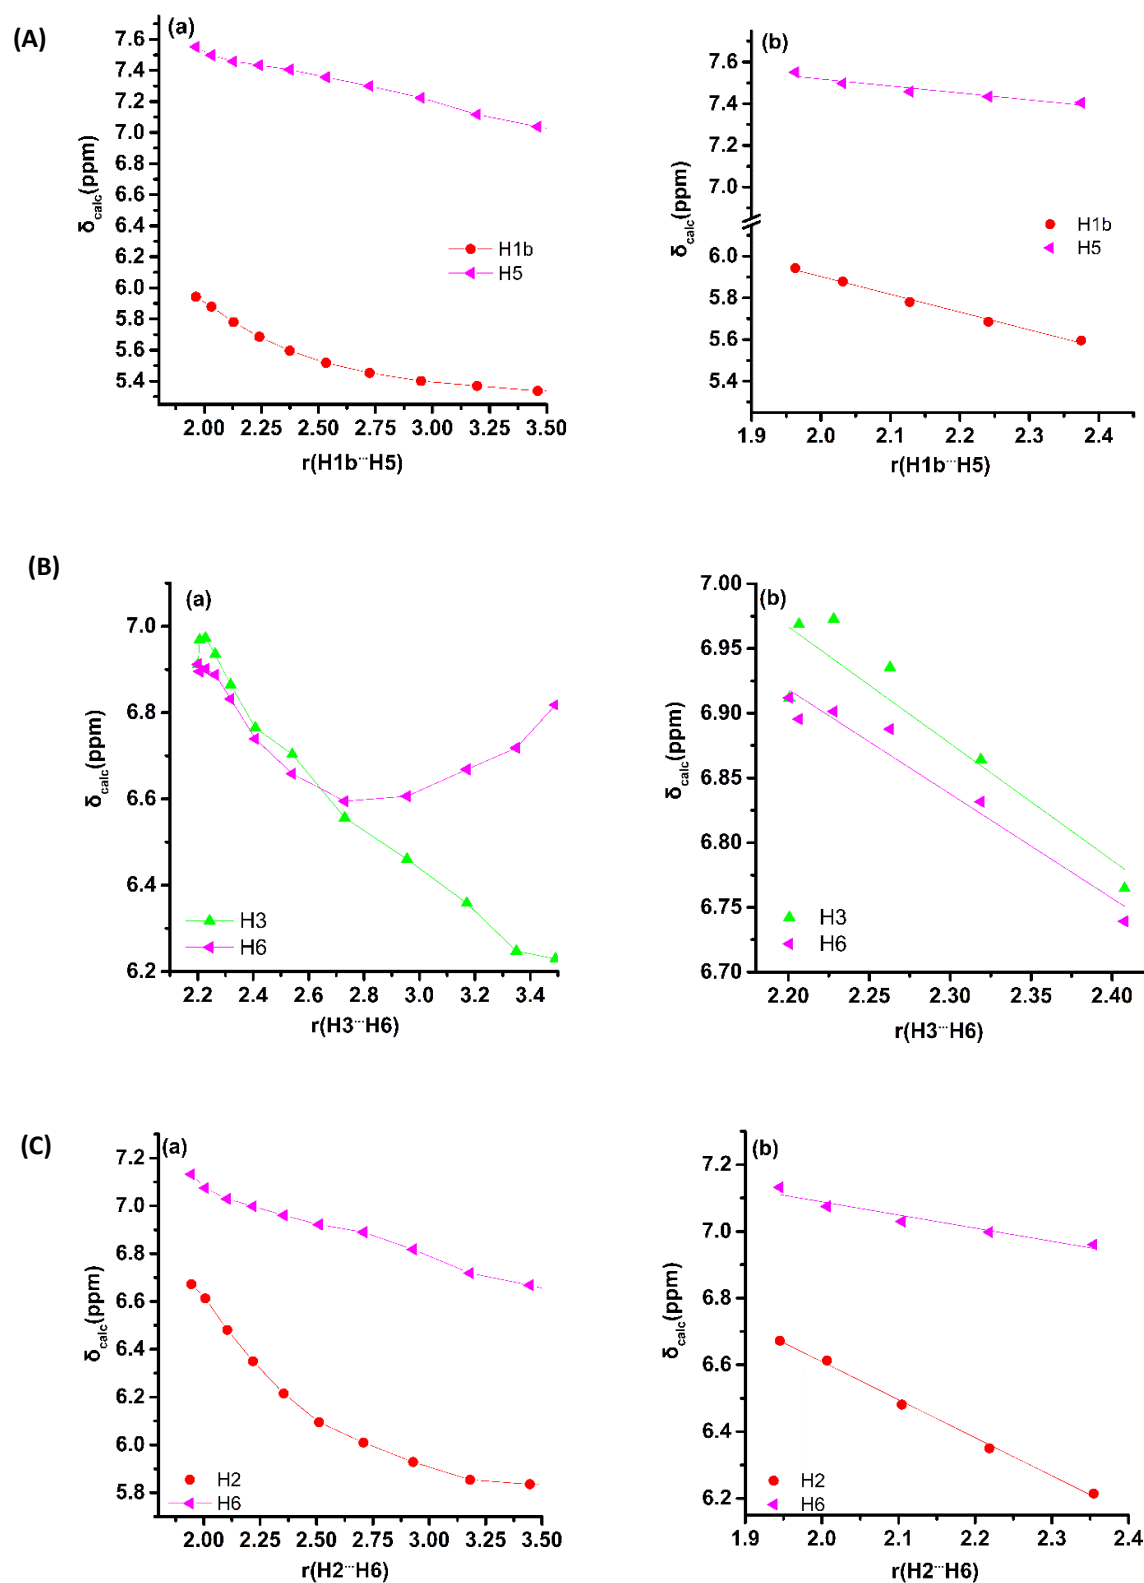

**Figure S9.** The dependence of  $\delta(\text{H1b}, \text{H5})$  vs. distance  $r(\text{H1b} \cdots \text{H5})$  of (Z)-1,3,5-hexatriene (A),  $\delta(\text{H3}, \text{H6})$  vs.  $r(\text{H3} \cdots \text{H6})$  of (E,Z,E)-2,4,6-octatriene (B) and  $\delta(\text{H2}, \text{H6})$  vs.  $r(\text{H2} \cdots \text{H6})$  of (E,Z,E)-2,4,6-octatriene (C).

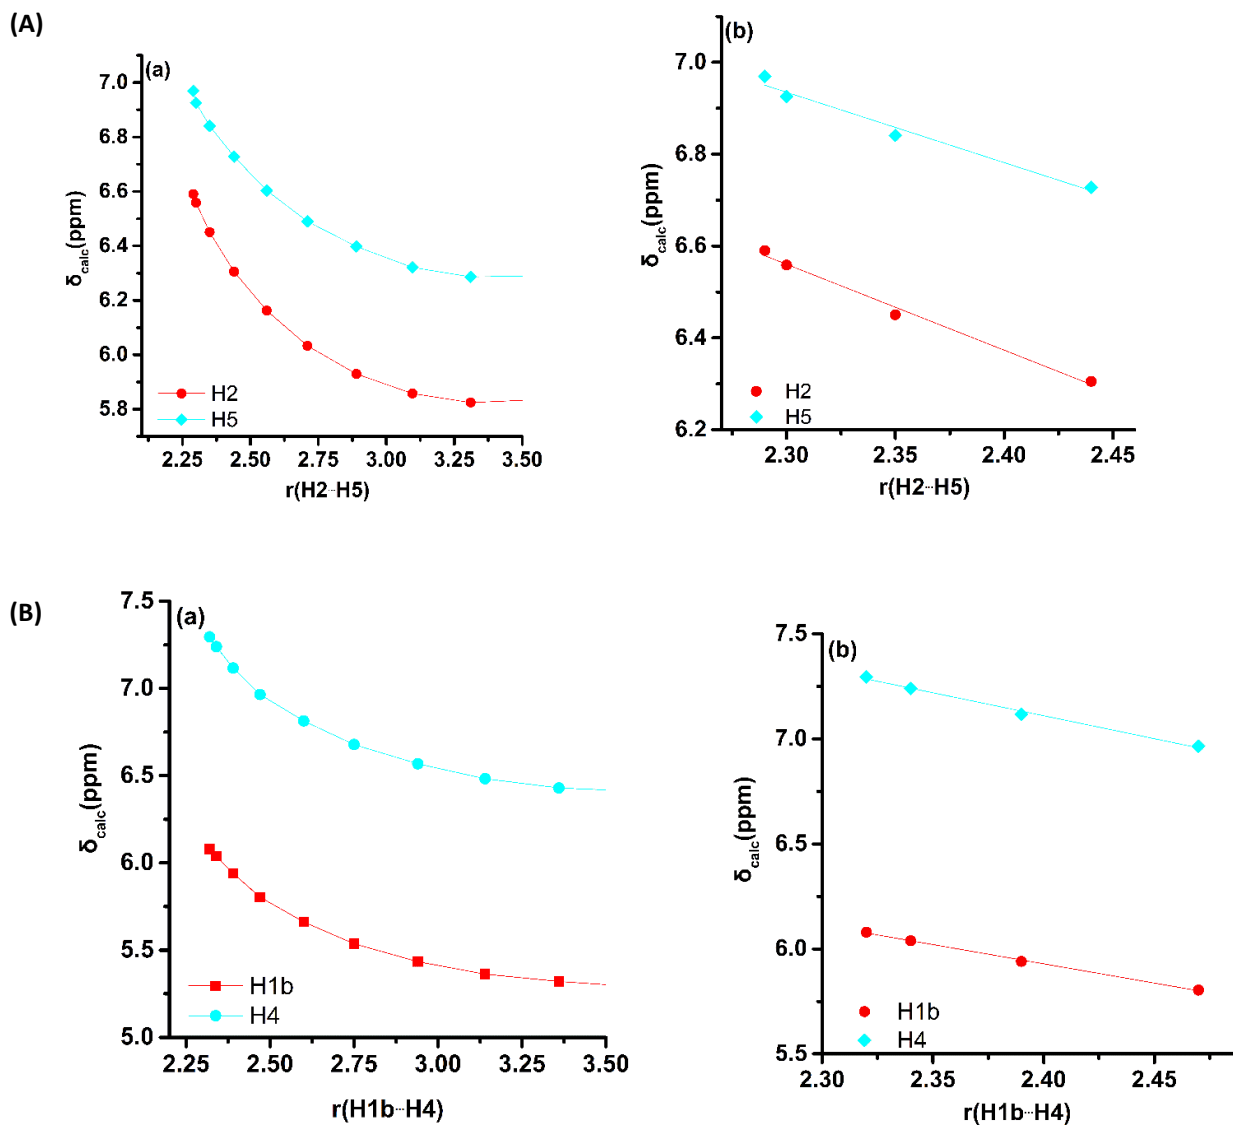

**Figure S10.** The dependence of  $\delta(\text{H2}, \text{H5})$  vs. distance  $r(\text{H2}\cdots\text{H5})$  of (*E,E,E*)-2,4,6-octatriene (**A**), and  $\delta(\text{H1b}, \text{H4})$  vs.  $r(\text{H1b}\cdots\text{H4})$  of (*E*)-1,3,5-hexatriene (**B**).

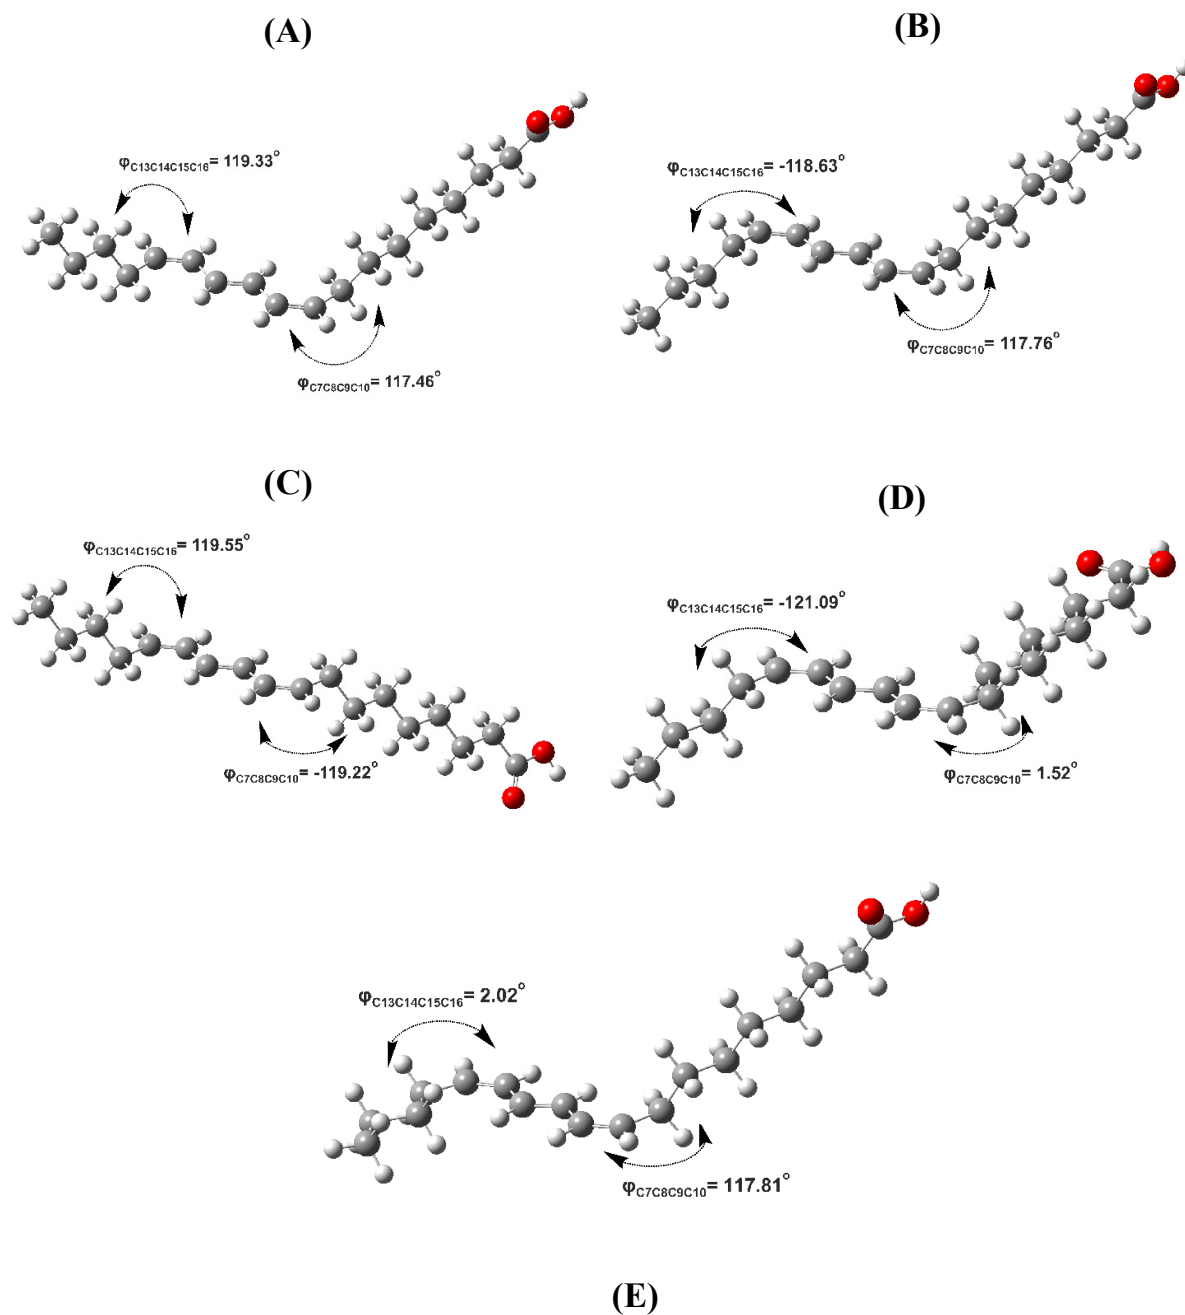

**Figure S11.** Structures of various conformers (A), (B), (C), (D) and (E) of the punicic acid (9Z,11E,13Z-isomer) with energy minimization in the gas-phase at the B3LYP/6-31+G(d) level of theory.  $\Delta G$  values (kcal.mol<sup>-1</sup>) and % populations of conformers (A), (B), (C), (D) and (E) are shown in Table 2.

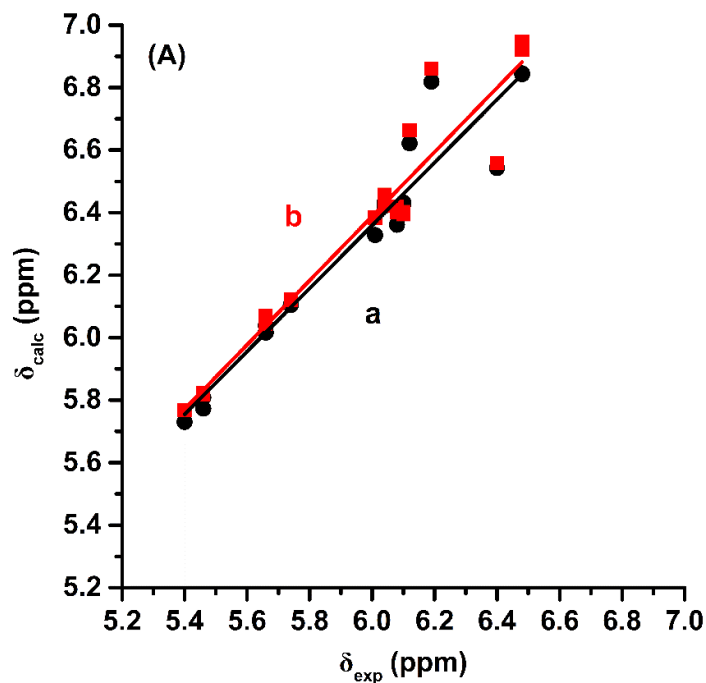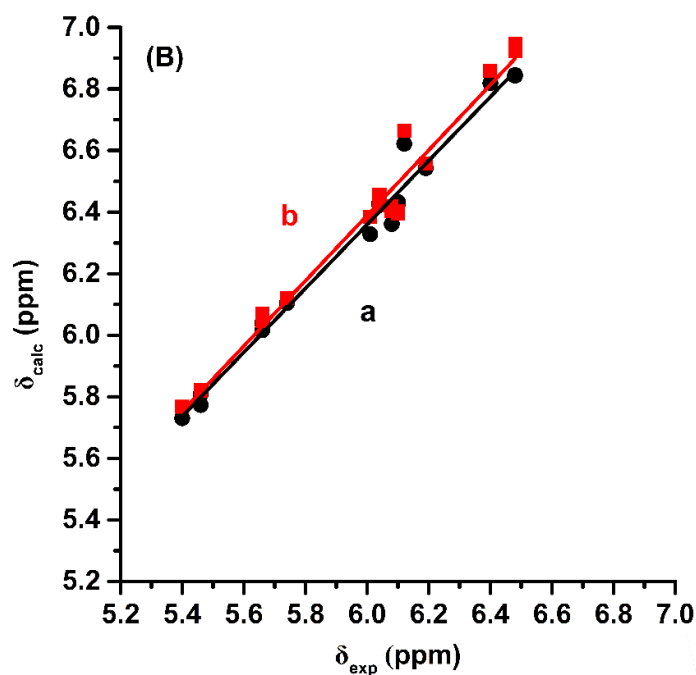

**Figure S12.** (A) Graphical presentation of calculated olefinic  $^1\text{H}$ -NMR chemical shifts (at the GIAO/B3LYP/6-311+G(2d,p) (CPCM,  $\text{CHCl}_3$ ) level), weighted by the respective Boltzmann factor of the various conformers of Table 2 (at the GIAO/B3LYP/6-311+G(2d,p) (CPCM,  $\text{CHCl}_3$ ) level of theory vs. experimental values of the chemical shifts of the three 9,11,13-conjugated fatty acid geometrical isomers with optimization of the structures at the B3LYP/6-31+G(d) (a), and APFD/6-31+G(d) (b) level. (B) as in (A), but the literature experimental chemical shift assignment of H11 and H12 of  $\beta$ -eleostearic acid (9Z,11E,13E isomer) [18] has been revised.

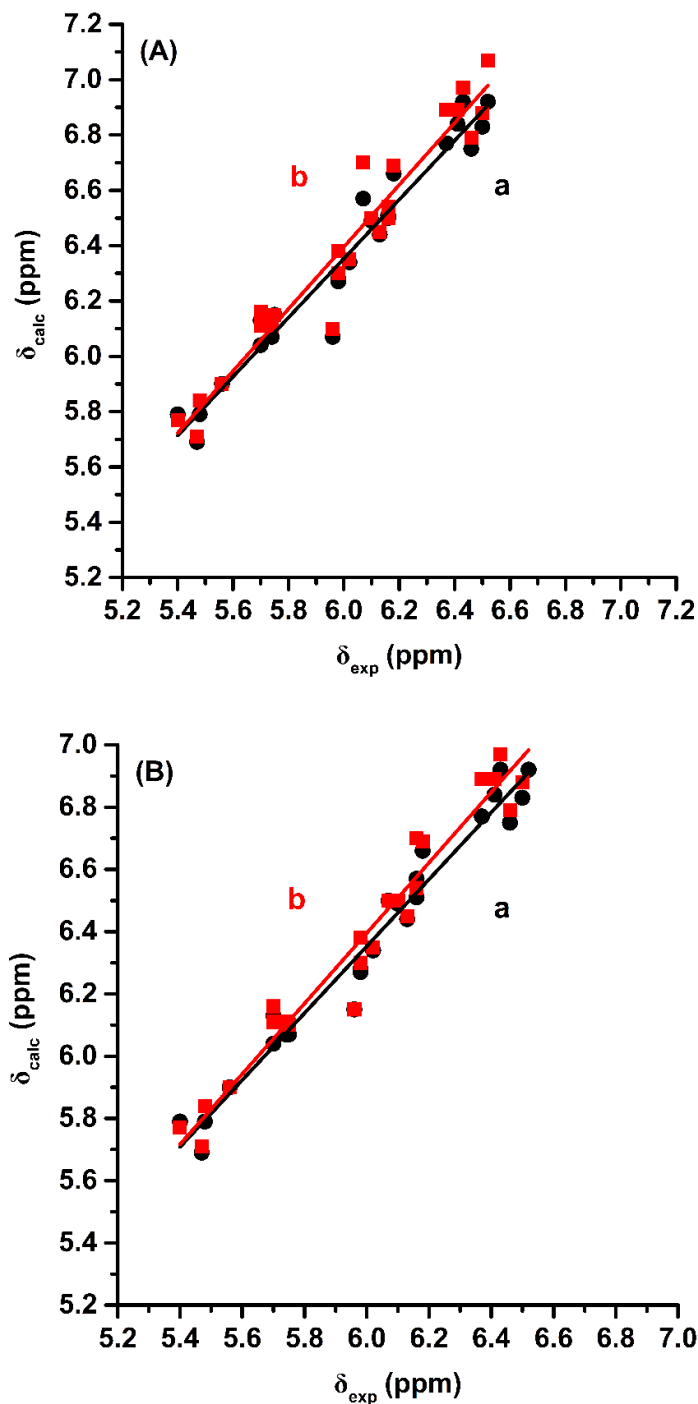

**Figure S13** (A) Graphical presentation of calculated olefinic  $^1\text{H}$ -NMR chemical shifts (at the GIAO/B3LYP/6-311+G(2d,p) (CPCM,  $\text{CHCl}_3$ ) level), weighted by the respective Boltzmann factor of the various conformers of Table 2 vs. experimental values of the chemical shifts of the four 10,12,14-conjugated hexadecatrienyl acetate geometrical isomers with optimization of the structures at the B3LYP/6-31+G(d) (a), and APFD/6-31+G(d) (b) level. (B) as in (A), but the experimental chemical shifts of H13 and H15 of 9Z,11Z,13E [13] and of H13 and H14 of 9Z,11E,13E-conjugated hexadecatrienyl acetates [13] have been revised.

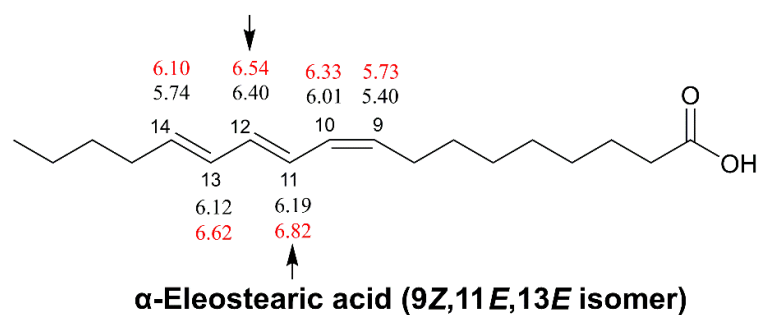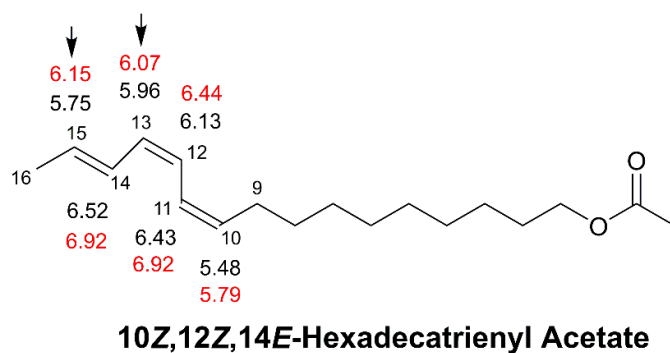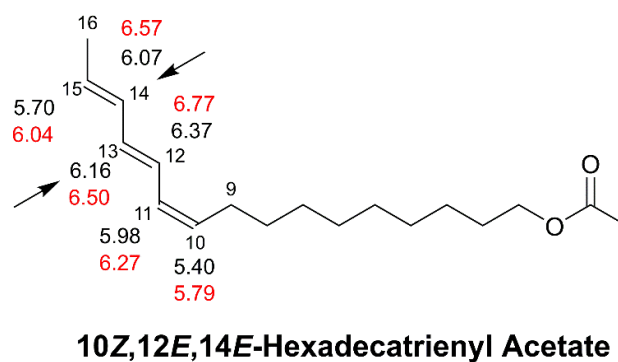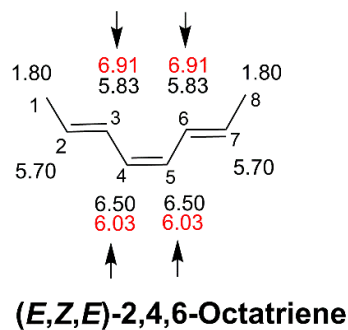

**Figure S14.** Experimental  $^1\text{H}$  NMR ( $\delta_{\text{exp}}$ , black color) and calculated ( $\delta_{\text{calc}}$ , red color) chemical shifts of the olefinic protons of (*E,Z,E*)-2,4,6-octatriene,  $\alpha$ -eleostearic acid, (10Z, 12Z, 14E)-hexadecatrienyl acetate, and (10Z, 12E, 14E)-hexadecatrienyl acetate with optimization of the structures at the B3LYP/6-31+G(d) level of theory. The arrows denote the literature  $\delta_{\text{exp}}$  values which should be revised.

**Table S1.** Experimental and computational (at the GIAO/B3LYP/6-311+G(2d,p) level with CPCM) <sup>1</sup>H-NMR chemical shifts of the model trienyl compounds (*Z*)-1,3,5-hexatriene, (*E*)-1,3,5-hexatriene, (*Z*)-1,3,5-hexatriene, (*E*)-1,3,5-hexatriene, (*E,E,E*)-2,4,6-octatriene and (*E,Z,E*)-2,4,6-octatriene (Fig. 1) for various functionals and basis sets.

| COMPOUND/<br>SOLVENT                                                  | GROUP    | EXP  | B3LYP/<br>6-31<br>+G(d) | B3LYP/<br>6-311<br>++G(d,p) | B3LYP-D3/<br>6-31<br>+G(d) | B3LYP-D3/<br>6-311<br>++G(d,p) | APFD/<br>6-31<br>+G(d) | APFD/<br>6-311<br>++G(d,p) | PBE0/<br>6-31<br>+G(d) | PBE0/<br>6-311<br>++G(d,p) | M062X/<br>6-31<br>+G(d) | M062X/<br>6-311<br>++G(d,p) | ωB97XD/<br>6-31<br>+G(d) | ωB97XD/<br>6-311<br>++G(d,p) |
|-----------------------------------------------------------------------|----------|------|-------------------------|-----------------------------|----------------------------|--------------------------------|------------------------|----------------------------|------------------------|----------------------------|-------------------------|-----------------------------|--------------------------|------------------------------|
| <b>(<i>Z</i>)-1,3,5-Hexatriene<sup>a</sup><br/>(CDCl<sub>3</sub>)</b> | C1-(H1a) | 5.15 | 5.41                    | 5.44                        | 5.42                       | 5.44                           | 5.44                   | 5.47                       | 5.42                   | 5.44                       | 5.45                    | 5.46                        | 5.42                     | 5.44                         |
|                                                                       | C1-(H1b) | 5.24 | 5.52                    | 5.55                        | 5.53                       | 5.56                           | 5.56                   | 5.59                       | 5.54                   | 5.56                       | 5.58                    | 5.59                        | 5.54                     | 5.56                         |
|                                                                       | C2       | 6.8  | 7.32                    | 7.35                        | 7.35                       | 7.39                           | 7.39                   | 7.43                       | 7.35                   | 7.38                       | 7.39                    | 7.40                        | 7.33                     | 7.36                         |
|                                                                       | C3       | 6.0  | 6.32                    | 6.35                        | 6.33                       | 6.36                           | 6.36                   | 6.39                       | 6.33                   | 6.35                       | 6.36                    | 6.37                        | 6.31                     | 6.33                         |
|                                                                       | C4       | 6.0  | 6.32                    | 6.35                        | 6.33                       | 6.36                           | 6.36                   | 6.39                       | 6.33                   | 6.35                       | 6.36                    | 6.37                        | 6.31                     | 6.33                         |
|                                                                       | C5       | 6.8  | 7.32                    | 7.35                        | 7.35                       | 7.39                           | 7.39                   | 7.43                       | 7.35                   | 7.38                       | 7.39                    | 7.40                        | 7.33                     | 7.36                         |
|                                                                       | C6-(H1a) | 5.15 | 5.41                    | 5.44                        | 5.42                       | 5.44                           | 5.44                   | 5.47                       | 5.42                   | 5.44                       | 5.45                    | 5.46                        | 5.42                     | 5.44                         |
|                                                                       | C6(H1b)  | 5.24 | 5.52                    | 5.55                        | 5.53                       | 5.56                           | 5.56                   | 5.59                       | 5.54                   | 5.56                       | 5.58                    | 5.59                        | 5.54                     | 5.56                         |
| <b>(<i>E</i>)-1,3,5-Hexatriene<sup>a</sup><br/>(CDCl<sub>3</sub>)</b> | C1-(H1a) | 5.1  | 5.34                    | 5.36                        | 5.34                       | 5.36                           | 5.36                   | 5.39                       | 5.34                   | 5.36                       | 5.36                    | 5.38                        | 5.33                     | 5.35                         |
|                                                                       | C1-(H1b) | 5.23 | 5.51                    | 5.53                        | 5.52                       | 5.54                           | 5.55                   | 5.58                       | 5.53                   | 5.55                       | 5.56                    | 5.57                        | 5.52                     | 5.54                         |
|                                                                       | C2       | 6.36 | 6.91                    | 6.93                        | 6.92                       | 6.94                           | 6.96                   | 6.98                       | 6.92                   | 6.94                       | 6.94                    | 6.95                        | 6.89                     | 6.91                         |
|                                                                       | C3       | 6.22 | 6.67                    | 6.70                        | 6.68                       | 6.71                           | 6.72                   | 6.75                       | 6.69                   | 6.70                       | 6.73                    | 6.74                        | 6.68                     | 6.69                         |
|                                                                       | C4       | 6.22 | 6.67                    | 6.70                        | 6.68                       | 6.71                           | 6.72                   | 6.75                       | 6.69                   | 6.70                       | 6.73                    | 6.74                        | 6.68                     | 6.69                         |
|                                                                       | C5       | 6.36 | 6.91                    | 6.93                        | 6.92                       | 6.94                           | 6.96                   | 6.98                       | 6.92                   | 6.94                       | 6.94                    | 6.95                        | 6.89                     | 6.91                         |
|                                                                       | C6-(H1a) | 5.1  | 5.34                    | 5.36                        | 5.34                       | 5.36                           | 5.36                   | 5.39                       | 5.34                   | 5.36                       | 5.36                    | 5.38                        | 5.33                     | 5.35                         |



|                                                                          |                       |      |      |      |      |      |      |      |      |      |      |      |      |      |
|--------------------------------------------------------------------------|-----------------------|------|------|------|------|------|------|------|------|------|------|------|------|------|
|                                                                          | C6(H1b)               | 5.23 | 5.51 | 5.53 | 5.52 | 5.54 | 5.55 | 5.58 | 5.53 | 5.55 | 5.56 | 5.57 | 5.52 | 5.54 |
| <b>(Z)-1.3.5-Hexatriene<sup>b,c</sup></b><br><b>(CCl<sub>4</sub>)</b>    | C1-(H1a)              | 5.09 | 5.38 | 5.40 | 5.38 | 5.41 | 5.39 | 5.41 | 5.38 | 5.40 | 5.39 | 5.42 | 5.38 | 5.40 |
|                                                                          | C1-(H1b)              | 5.17 | 5.48 | 5.51 | 5.49 | 5.52 | 5.51 | 5.53 | 5.50 | 5.52 | 5.52 | 5.55 | 5.50 | 5.52 |
|                                                                          | C2                    | 6.74 | 7.28 | 7.32 | 7.31 | 7.35 | 7.35 | 7.37 | 7.31 | 7.34 | 7.33 | 7.36 | 7.29 | 7.32 |
|                                                                          | C3                    | 5.93 | 6.28 | 6.31 | 6.29 | 6.32 | 6.31 | 6.33 | 6.29 | 6.31 | 6.30 | 6.33 | 6.27 | 6.29 |
|                                                                          | C4                    | 5.93 | 6.28 | 6.31 | 6.29 | 6.32 | 6.31 | 6.33 | 6.29 | 6.31 | 6.30 | 6.33 | 6.27 | 6.29 |
|                                                                          | C5                    | 6.74 | 7.28 | 7.32 | 7.31 | 7.35 | 7.35 | 7.37 | 7.31 | 7.34 | 7.33 | 7.36 | 7.29 | 7.32 |
|                                                                          | C6-(H1a)              | 5.09 | 5.38 | 5.40 | 5.35 | 5.41 | 5.39 | 5.41 | 5.38 | 5.41 | 5.39 | 5.42 | 5.38 | 5.40 |
|                                                                          | C6(H1b)               | 5.17 | 5.48 | 5.51 | 5.49 | 5.52 | 5.51 | 5.53 | 5.50 | 5.52 | 5.52 | 5.55 | 5.50 | 5.52 |
| <b>(E)-1.3.5-Hexatriene<sup>b,c</sup></b><br><b>(CCl<sub>4</sub>)</b>    | C1-(H1a)              | 5.05 | 5.30 | 5.33 | 5.30 | 5.33 | 5.32 | 5.34 | 5.31 | 5.32 | 5.31 | 5.34 | 5.29 | 5.32 |
|                                                                          | C1-(H1b)              | 5.18 | 5.47 | 5.50 | 5.48 | 5.51 | 5.50 | 5.52 | 5.49 | 5.51 | 5.50 | 5.53 | 5.48 | 5.51 |
|                                                                          | C2                    | 6.3  | 6.87 | 6.90 | 6.88 | 6.91 | 6.91 | 6.92 | 6.88 | 6.90 | 6.88 | 6.91 | 6.85 | 6.87 |
|                                                                          | C3                    | 6.16 | 6.63 | 6.65 | 6.64 | 6.67 | 6.67 | 6.69 | 6.64 | 6.66 | 6.67 | 6.70 | 6.63 | 6.65 |
|                                                                          | C4                    | 6.16 | 6.63 | 6.65 | 6.64 | 6.67 | 6.67 | 6.69 | 6.64 | 6.66 | 6.67 | 6.70 | 6.63 | 6.65 |
|                                                                          | C5                    | 6.3  | 6.87 | 6.90 | 6.88 | 6.91 | 6.91 | 6.92 | 6.88 | 6.90 | 6.88 | 6.91 | 6.85 | 6.87 |
|                                                                          | C6-(H1a)              | 5.05 | 5.30 | 5.33 | 5.30 | 5.33 | 5.32 | 5.34 | 5.31 | 5.32 | 5.31 | 5.34 | 5.29 | 5.32 |
|                                                                          | C6(H1b)               | 5.18 | 5.47 | 5.50 | 5.48 | 5.51 | 5.50 | 5.52 | 5.49 | 5.51 | 5.50 | 5.53 | 5.48 | 5.51 |
| <b>(E,Z,E)-2.4.6-Octatriene<sup>d</sup></b><br><b>(CDCl<sub>3</sub>)</b> | C1-(CH <sub>3</sub> ) | 1.8  | 1.90 | 1.91 | 1.94 | 1.95 | 1.94 | 1.96 | 1.92 | 1.93 | 1.91 | 1.91 | 1.89 | 1.91 |
|                                                                          | C2-(CH)               | 5.7  | 6.07 | 6.10 | 6.08 | 6.11 | 6.12 | 6.14 | 6.08 | 6.10 | 6.13 | 6.15 | 6.08 | 6.10 |
|                                                                          | C3-(CH)               | 5.83 | 6.91 | 6.94 | 6.94 | 6.98 | 6.99 | 7.03 | 6.94 | 6.97 | 7.00 | 7.01 | 6.94 | 6.96 |

|                                                                   |                       |      |      |      |      |      |      |      |      |      |      |      |      |      |
|-------------------------------------------------------------------|-----------------------|------|------|------|------|------|------|------|------|------|------|------|------|------|
|                                                                   | C4-(CH)               | 6.5  | 6.03 | 6.06 | 6.03 | 6.07 | 6.07 | 6.09 | 6.03 | 6.05 | 6.07 | 6.08 | 6.02 | 6.04 |
|                                                                   | C5-(CH)               | 6.5  | 6.03 | 6.06 | 6.03 | 6.06 | 6.07 | 6.09 | 6.03 | 6.05 | 6.07 | 6.08 | 6.02 | 6.04 |
|                                                                   | C6-(CH)               | 5.83 | 6.91 | 6.94 | 6.94 | 6.98 | 6.99 | 7.03 | 6.94 | 6.97 | 7.00 | 7.01 | 6.94 | 6.96 |
|                                                                   | C7-(CH)               | 5.7  | 6.07 | 6.10 | 6.08 | 6.11 | 6.12 | 6.14 | 6.08 | 6.10 | 6.13 | 6.15 | 6.08 | 6.10 |
|                                                                   | C8-(CH)               | 1.8  | 1.90 | 1.91 | 1.94 | 1.95 | 1.94 | 1.96 | 1.92 | 1.93 | 1.91 | 1.91 | 1.89 | 1.91 |
| <b>(E.E.E)-2.4.6-Octatriene<sup>b</sup><br/>(CCl<sub>4</sub>)</b> | C1-(CH <sub>3</sub> ) | 1.84 | 1.86 | 1.87 | 1.86 | 1.89 | 1.88 | 1.89 | 1.87 | 1.88 | 1.84 | 1.86 | 1.84 | 1.85 |
|                                                                   | C2                    | 5.69 | 5.98 | 6.00 | 5.98 | 6.05 | 6.00 | 6.02 | 5.98 | 6.00 | 6.01 | 6.04 | 5.98 | 6.00 |
|                                                                   | C3                    | 6.12 | 6.45 | 6.48 | 6.46 | 6.38 | 6.49 | 6.50 | 6.46 | 6.47 | 6.47 | 6.50 | 6.44 | 6.45 |
|                                                                   | C4                    | 6.10 | 6.55 | 6.58 | 6.56 | 6.19 | 6.59 | 6.61 | 6.57 | 6.58 | 6.59 | 6.62 | 6.55 | 6.58 |
|                                                                   | C5                    | 6.10 | 6.55 | 6.58 | 6.56 | 6.19 | 6.59 | 6.61 | 6.57 | 6.58 | 6.59 | 6.62 | 6.55 | 6.58 |
|                                                                   | C6                    | 6.12 | 6.45 | 6.48 | 6.46 | 6.38 | 6.49 | 6.50 | 6.46 | 6.47 | 6.47 | 6.50 | 6.44 | 6.45 |
|                                                                   | C7                    | 5.69 | 5.98 | 6.00 | 5.98 | 6.05 | 6.00 | 6.02 | 5.98 | 6.00 | 6.01 | 6.04 | 5.98 | 6.00 |
|                                                                   | C8                    | 1.84 | 1.86 | 1.87 | 1.86 | 1.89 | 1.88 | 1.89 | 1.87 | 1.88 | 1.84 | 1.86 | 1.84 | 1.85 |

<sup>a</sup> Ref. [15]; <sup>b</sup> Ref. [21]; <sup>c</sup> Ref. [22]; <sup>d</sup> Ref. [23]

**Table S2.** Experimental and computational (using the same level of theory as geometry optimization) <sup>1</sup>H-NMR chemical shifts of the model trienyl compounds (*Z*)-1,3,5-hexatriene, (*E*)-1,3,5-hexatriene, (*Z*)-1,3,5-hexatriene, (*E*)-1,3,5-hexatriene, (*E,E,E*)-2,4,6-octatriene and (*E,Z,E*)-2,4,6-octatriene (Fig. 1) for various functionals and basis sets.

| COMPOUND/<br>SOLVENT                                                       | GROUP        | EXP  | B3LYP/<br>6-31<br>+G(d) | B3LYP/<br>6-311<br>++G(d,p) | B3LYP-D3/<br>6-31<br>+G(d) | B3LYP-D3/<br>6-311<br>++G(d,p) | APFD/<br>6-31<br>+G(d) | APFD/<br>6-311<br>++G(d,p) | PBE0/<br>6-31<br>+G(d) | PBE0/<br>6-311<br>++G(d,p) | M062X/<br>6-31<br>+G(d) | M062X/<br>6-311<br>++G(d,p) | $\omega$ B97XD/<br>6-31<br>+G(d) | $\omega$ B97XD/<br>6-311<br>++G(d,p) |
|----------------------------------------------------------------------------|--------------|------|-------------------------|-----------------------------|----------------------------|--------------------------------|------------------------|----------------------------|------------------------|----------------------------|-------------------------|-----------------------------|----------------------------------|--------------------------------------|
| <b>(<i>Z</i>)-1.3.5-<br/>Hexatriene<sup>a</sup><br/>(CDCl<sub>3</sub>)</b> | C1-<br>(H1a) | 5.15 | 5.27                    | 5.46                        | 5.27                       | 5.47                           | 5.39                   | 5.57                       | 5.40                   | 5.57                       | 5.89                    | 6.07                        | 5.43                             | 5.43                                 |
|                                                                            | C1-<br>(H1b) | 5.24 | 5.34                    | 5.57                        | 5.34                       | 5.58                           | 5.46                   | 5.68                       | 5.47                   | 5.68                       | 5.94                    | 6.13                        | 5.51                             | 5.51                                 |
|                                                                            | C2           | 6.8  | 7.12                    | 7.37                        | 7.14                       | 7.39                           | 7.25                   | 7.47                       | 7.24                   | 7.45                       | 7.82                    | 7.99                        | 7.20                             | 7.20                                 |
|                                                                            | C3           | 6.0  | 6.13                    | 6.34                        | 6.14                       | 6.35                           | 6.26                   | 6.44                       | 6.26                   | 6.42                       | 6.64                    | 6.81                        | 6.24                             | 6.24                                 |
|                                                                            | C4           | 6.0  | 6.13                    | 6.34                        | 6.14                       | 6.35                           | 6.26                   | 6.44                       | 6.26                   | 6.42                       | 6.64                    | 6.82                        | 6.24                             | 6.24                                 |
|                                                                            | C5           | 6.8  | 7.12                    | 7.37                        | 7.14                       | 7.39                           | 7.25                   | 7.47                       | 7.24                   | 7.45                       | 7.82                    | 7.99                        | 7.20                             | 7.20                                 |
|                                                                            | C6-<br>(H1a) | 5.15 | 5.27                    | 5.46                        | 5.27                       | 5.47                           | 5.39                   | 5.57                       | 5.39                   | 5.57                       | 5.89                    | 6.07                        | 5.42                             | 5.42                                 |
|                                                                            | C6(H1b)      | 5.24 | 5.34                    | 5.57                        | 5.34                       | 5.58                           | 5.46                   | 5.68                       | 5.47                   | 5.68                       | 5.94                    | 6.13                        | 5.51                             | 5.51                                 |
| <b>(<i>E</i>)-1.3.5-<br/>Hexatriene<sup>a</sup><br/>(CDCl<sub>3</sub>)</b> | C1-<br>(H1a) | 5.1  | 5.21                    | 5.39                        | 5.21                       | 5.39                           | 5.33                   | 5.50                       | 5.34                   | 5.50                       | 5.73                    | 5.87                        | 5.32                             | 5.32                                 |
|                                                                            | C1-<br>(H1b) | 5.23 | 5.35                    | 5.57                        | 5.35                       | 5.58                           | 5.47                   | 5.68                       | 5.48                   | 5.68                       | 5.90                    | 6.13                        | 5.47                             | 5.47                                 |
|                                                                            | C2           | 6.36 | 6.66                    | 6.94                        | 6.67                       | 6.95                           | 6.78                   | 7.01                       | 6.78                   | 7.00                       | 7.29                    | 7.49                        | 6.75                             | 6.75                                 |
|                                                                            | C3           | 6.22 | 6.23                    | 6.65                        | 6.24                       | 6.65                           | 6.38                   | 6.73                       | 6.38                   | 6.72                       | 6.91                    | 7.25                        | 6.48                             | 6.48                                 |
|                                                                            | C4           | 6.22 | 6.23                    | 6.65                        | 6.24                       | 6.65                           | 6.38                   | 6.73                       | 6.38                   | 6.72                       | 6.91                    | 7.25                        | 6.48                             | 6.48                                 |
|                                                                            | C5           | 6.36 | 6.66                    | 6.94                        | 6.67                       | 6.95                           | 6.78                   | 7.01                       | 6.78                   | 7.00                       | 7.29                    | 7.49                        | 6.75                             | 6.75                                 |
|                                                                            | C6-<br>(H1a) | 5.1  | 5.21                    | 5.39                        | 5.35                       | 5.58                           | 5.33                   | 5.50                       | 5.34                   | 5.50                       | 5.73                    | 5.87                        | 5.32                             | 5.32                                 |

|                                                                     |                       |      |      |      |      |      |      |      |      |      |      |      |      |      |
|---------------------------------------------------------------------|-----------------------|------|------|------|------|------|------|------|------|------|------|------|------|------|
|                                                                     | C6(H1b)               | 5.23 | 5.35 | 5.57 | 5.21 | 5.39 | 5.47 | 5.68 | 5.48 | 5.68 | 5.90 | 6.13 | 5.47 | 5.47 |
| <b>(Z)-1.3.5-Hexatriene<sup>b,c</sup></b><br>(CCl <sub>4</sub> )    | C1-(H1a)              | 5.09 | 5.23 | 5.42 | 5.23 | 5.42 | 5.36 | 5.52 | 5.35 | 5.53 | 5.84 | 6.02 | 5.38 | 5.38 |
|                                                                     | C1-(H1b)              | 5.17 | 5.29 | 5.52 | 5.30 | 5.54 | 5.43 | 5.63 | 5.42 | 5.63 | 5.89 | 6.08 | 5.46 | 5.46 |
|                                                                     | C2                    | 6.74 | 7.08 | 7.32 | 7.09 | 7.35 | 7.21 | 7.42 | 7.19 | 7.41 | 7.77 | 7.95 | 7.16 | 7.16 |
|                                                                     | C3                    | 5.93 | 6.09 | 6.30 | 6.10 | 6.31 | 6.23 | 6.39 | 6.21 | 6.38 | 6.60 | 6.77 | 6.19 | 6.19 |
|                                                                     | C4                    | 5.93 | 6.09 | 6.30 | 6.10 | 6.31 | 6.23 | 6.39 | 6.21 | 6.38 | 6.60 | 6.77 | 6.19 | 6.19 |
|                                                                     | C5                    | 6.74 | 7.08 | 7.32 | 7.09 | 7.35 | 7.21 | 7.42 | 7.19 | 7.41 | 7.77 | 7.95 | 7.16 | 7.16 |
|                                                                     | C6-(H1a)              | 5.09 | 5.23 | 5.42 | 5.23 | 5.42 | 5.35 | 5.52 | 5.35 | 5.53 | 5.84 | 6.02 | 5.38 | 5.38 |
|                                                                     | C6(H1b)               | 5.17 | 5.29 | 5.53 | 5.30 | 5.54 | 5.42 | 5.63 | 5.42 | 5.63 | 5.89 | 6.08 | 5.46 | 5.46 |
| <b>(E)-1.3.5-Hexatriene<sup>b,c</sup></b><br>(CCl <sub>4</sub> )    | C1-(H1a)              | 5.05 | 5.17 | 5.35 | 5.17 | 5.35 | 5.30 | 5.46 | 5.29 | 5.46 | 5.68 | 5.83 | 5.28 | 5.28 |
|                                                                     | C1-(H1b)              | 5.18 | 5.31 | 5.53 | 5.31 | 5.54 | 5.44 | 5.63 | 5.43 | 5.63 | 5.85 | 6.08 | 5.43 | 5.43 |
|                                                                     | C2                    | 6.3  | 6.62 | 6.90 | 6.63 | 6.91 | 6.75 | 6.97 | 6.73 | 6.96 | 7.24 | 7.45 | 6.71 | 6.71 |
|                                                                     | C3                    | 6.16 | 6.19 | 6.60 | 6.19 | 6.61 | 6.34 | 6.68 | 6.33 | 6.67 | 6.86 | 7.20 | 6.43 | 6.43 |
|                                                                     | C4                    | 6.16 | 6.19 | 6.60 | 6.19 | 6.61 | 6.34 | 6.68 | 6.33 | 6.67 | 6.86 | 7.20 | 6.43 | 6.43 |
|                                                                     | C5                    | 6.3  | 6.62 | 6.90 | 6.63 | 6.91 | 6.75 | 6.97 | 6.73 | 6.96 | 7.24 | 7.45 | 6.71 | 6.71 |
|                                                                     | C6-(H1a)              | 5.05 | 5.17 | 5.35 | 5.31 | 5.54 | 5.30 | 5.46 | 5.29 | 5.46 | 5.68 | 5.83 | 5.28 | 5.28 |
|                                                                     | C6(H1b)               | 5.18 | 5.31 | 5.53 | 5.17 | 5.35 | 5.44 | 5.63 | 5.43 | 5.63 | 5.85 | 6.08 | 5.43 | 5.43 |
| <b>(E,Z,E)-2.4.6-Octatriene<sup>d</sup></b><br>(CDCl <sub>3</sub> ) | C1-(CH <sub>3</sub> ) | 1.8  | 1.87 | 1.92 | 1.89 | 1.96 | 1.88 | 1.93 | 1.78 | 1.92 | 2.10 | 2.04 | 1.60 | 1.60 |
|                                                                     | C2-(CH)               | 5.7  | 5.84 | 6.07 | 5.84 | 6.08 | 5.92 | 6.14 | 5.83 | 6.13 | 6.30 | 6.47 | 6.03 | 6.03 |
|                                                                     | C3-(CH)               | 5.83 | 6.79 | 6.99 | 6.81 | 7.02 | 6.90 | 7.08 | 6.81 | 7.06 | 7.42 | 7.74 | 6.74 | 6.74 |

|                                                                   |                       |      |      |      |      |      |      |      |      |      |      |      |      |      |
|-------------------------------------------------------------------|-----------------------|------|------|------|------|------|------|------|------|------|------|------|------|------|
|                                                                   | C4-(CH)               | 6.5  | 5.87 | 6.09 | 5.88 | 6.09 | 5.99 | 6.18 | 5.89 | 6.17 | 6.33 | 6.45 | 6.05 | 6.05 |
|                                                                   | C5-(CH)               | 6.5  | 5.87 | 6.09 | 5.88 | 6.09 | 5.99 | 6.18 | 5.89 | 6.17 | 6.33 | 6.45 | 6.05 | 6.05 |
|                                                                   | C6-(CH)               | 5.83 | 6.79 | 6.99 | 6.81 | 7.02 | 6.90 | 7.08 | 6.81 | 7.06 | 7.42 | 7.74 | 6.74 | 6.74 |
|                                                                   | C7-(CH)               | 5.7  | 5.84 | 6.07 | 5.84 | 6.08 | 5.92 | 6.14 | 5.83 | 6.13 | 6.30 | 6.47 | 6.03 | 6.03 |
|                                                                   | C8-(CH)               | 1.8  | 1.87 | 1.92 | 1.89 | 1.96 | 1.88 | 1.93 | 1.78 | 1.92 | 2.10 | 2.04 | 1.60 | 1.60 |
| <b>(E.E.E)-2.4.6-Octatriene<sup>b</sup><br/>(CCl<sub>4</sub>)</b> | C1-(CH <sub>3</sub> ) | 1.84 | 1.85 | 1.90 | 1.86 | 1.90 | 1.85 | 1.90 | 1.84 | 1.89 | 1.79 | 1.84 | 1.75 | 1.75 |
|                                                                   | C2                    | 5.69 | 5.93 | 6.07 | 5.93 | 5.99 | 6.01 | 6.13 | 6.00 | 6.12 | 6.43 | 6.50 | 5.97 | 5.97 |
|                                                                   | C3                    | 6.12 | 6.07 | 6.49 | 6.07 | 6.39 | 6.20 | 6.54 | 6.19 | 6.53 | 6.77 | 7.17 | 6.23 | 6.23 |
|                                                                   | C4                    | 6.10 | 5.85 | 6.42 | 5.85 | 6.38 | 6.01 | 6.49 | 6.01 | 6.48 | 6.51 | 7.07 | 6.18 | 6.18 |
|                                                                   | C5                    | 6.10 | 5.85 | 6.42 | 5.85 | 6.38 | 6.01 | 6.49 | 6.01 | 6.48 | 6.51 | 7.07 | 6.18 | 6.18 |
|                                                                   | C6                    | 6.12 | 6.07 | 6.49 | 6.07 | 6.39 | 6.20 | 6.54 | 6.19 | 6.53 | 6.77 | 7.17 | 6.23 | 6.23 |
|                                                                   | C7                    | 5.69 | 5.93 | 6.07 | 5.93 | 5.99 | 6.01 | 6.13 | 6.00 | 6.12 | 6.43 | 6.50 | 5.97 | 5.97 |
|                                                                   | C8                    | 1.84 | 1.85 | 1.90 | 1.86 | 1.90 | 1.85 | 1.90 | 1.84 | 1.89 | 1.79 | 1.84 | 1.75 | 1.75 |

<sup>a</sup> Ref. [15]; <sup>b</sup> Ref. [21]; <sup>c</sup> Ref. [22]; <sup>d</sup> Ref. [23]

**Table S3.** Linear regression correlation coefficient, mean square error, intercept and slope of calculated (at the GIAO/B3LYP/6-311+G(2d,p) level with CPCM) vs. experimental  $^1\text{H}$  chemical shifts of the model trienyl compounds (*Z*)-1,3,5-hexatriene, (*E*)-1,3,5-hexatriene, (*E,Z,E*)-2,4,6-octatriene and (*E,E,E*)-2,4,6-octatriene determined from various optimized geometries. (A) Data of Fig. S2(A); (B) data of Fig. S2(B).

| Method                       | (A)                           |                   |           |       | (B)                           |                   |           |       |
|------------------------------|-------------------------------|-------------------|-----------|-------|-------------------------------|-------------------|-----------|-------|
|                              | Correlation coefficient $R^2$ | Mean square error | Intercept | Slope | Correlation coefficient $R^2$ | Mean square error | Intercept | Slope |
| B3LYP/6-31+G(d)              | 0.847                         | 0.067             | -0.067    | 1.074 | 0.991                         | 0.004             | -0.561    | 1.160 |
| B3LYP/6-311++G(d,p)          | 0.848                         | 0.067             | -0.056    | 1.077 | 0.991                         | 0.004             | -0.550    | 1.162 |
| B3LYP-D3/6-31+G(d)           | 0.844                         | 0.067             | -0.108    | 1.083 | 0.991                         | 0.004             | -0.619    | 1.171 |
| B3LYP-D3/6-311++G(d,p)       | 0.827                         | 0.076             | 0.012     | 1.064 | 0.975                         | 0.011             | -0.502    | 1.153 |
| APFD/6-31+G(d)               | 0.844                         | 0.071             | -0.142    | 1.094 | 0.991                         | 0.004             | -0.658    | 1.183 |
| APFD/6-311++G(d,p)           | 0.841                         | 0.072             | -0.113    | 1.093 | 0.991                         | 0.004             | -0.641    | 1.184 |
| PBE0/6-31+G(d)               | 0.843                         | 0.070             | -0.078    | 1.079 | 0.990                         | 0.004             | -0.588    | 1.167 |
| PBE0/6-311++G(d,p)           | 0.842                         | 0.071             | -0.072    | 1.081 | 0.990                         | 0.004             | -0.589    | 1.170 |
| M06-2X/6-31+G(d)             | 0.841                         | 0.071             | -0.082    | 1.084 | 0.991                         | 0.004             | -0.604    | 1.174 |
| M06-2X/6-311++G(d,p)         | 0.841                         | 0.071             | -0.049    | 1.082 | 0.991                         | 0.004             | -0.571    | 1.172 |
| $\omega$ B97XD/6-31+G(d)     | 0.840                         | 0.070             | -0.031    | 1.069 | 0.990                         | 0.004             | -0.547    | 1.158 |
| $\omega$ B97XD/6-311++G(d,p) | 0.840                         | 0.070             | -0.011    | 1.069 | 0.990                         | 0.004             | -0.527    | 1.158 |

**Table S4.** (A) Linear regression correlation coefficient, mean square error, intercept and slope of calculated vs. experimental  $^1\text{H}$  chemical shifts of the olefinic protons of the model trienyl compounds (*Z*)-1,3,5-hexatriene, (*E*)-1,3,5-hexatriene, (*E,Z,E*)-2,4,6-octatriene and (*E,E,E*)-2,4,6-octatriene using the same level of theory as geometry optimization (Fig. 2(A)). (B) As in (A), but the literature experimental values of  $\delta(\text{H}(3,6)) = 5.83$  ppm and  $\delta(\text{H}(4,5)) = 6.50$  ppm, of (*E,Z,E*)-2,4,6-octatriene [23] have been reversed.

| Method                       | (A)                           |                   |           |       | (B)                           |                   |           |       |
|------------------------------|-------------------------------|-------------------|-----------|-------|-------------------------------|-------------------|-----------|-------|
|                              | Correlation coefficient $R^2$ | Mean square error | Intercept | Slope | Correlation coefficient $R^2$ | Mean square error | Intercept | Slope |
| B3LYP/6-31+G(d)              | 0.799                         | 0.077             | 0.257     | 0.979 | 0.955                         | 0.017             | -0.258    | 1.068 |
| B3LYP/6-311++G(d,p)          | 0.840                         | 0.067             | 0.105     | 1.050 | 0.990                         | 0.004             | -0.401    | 1.137 |
| B3LYP-D3/6-31+G(d)           | 0.794                         | 0.080             | 0.241     | 0.983 | 0.950                         | 0.020             | -0.279    | 1.072 |
| B3LYP-D3/6-311++G(d,p)       | 0.827                         | 0.074             | 0.110     | 1.049 | 0.978                         | 0.009             | -0.409    | 1.139 |
| APFD/6-31+G(d)               | 0.806                         | 0.075             | 0.353     | 0.984 | 0.961                         | 0.015             | -0.159    | 1.073 |
| APFD/6-311++G(d,p)           | 0.837                         | 0.067             | 0.267     | 1.038 | 0.988                         | 0.005             | -0.239    | 1.125 |
| PBE0/6-31+G(d)               | 0.800                         | 0.075             | 0.419     | 0.970 | 0.957                         | 0.016             | -0.094    | 1.058 |
| PBE0/6-311++G(d,p)           | 0.837                         | 0.066             | 0.326     | 1.026 | 0.987                         | 0.005             | -0.172    | 1.112 |
| M06-2X/6-31+G(d)             | 0.786                         | 0.093             | 0.532     | 1.033 | 0.958                         | 0.018             | -0.077    | 1.138 |
| M06-2X/6-311++G(d,p)         | 0.773                         | 0.108             | 0.527     | 1.073 | 0.970                         | 0.014             | -0.200    | 1.198 |
| $\omega$ B97XD/6-31+G(d)     | 0.858                         | 0.051             | 0.389     | 0.980 | 0.982                         | 0.006             | 0.003     | 1.046 |
| $\omega$ B97XD/6-311++G(d,p) | 0.828                         | 0.062             | 0.674     | 0.963 | 0.984                         | 0.006             | 0.185     | 1.048 |

**Table S5.** Effect of variation of the torsion angle  $\phi(\text{C}_1\text{C}_2\text{C}_3\text{C}_4)$  of (Z)-1.3.5-hexatriene, with energy minimization at the B3LYP/6-31+G(d) level on calculated  $^1\text{H}$ -NMR chemical shifts (at the GIAO/B3LYP/6-311+G(2d,p) level with CPCM in  $\text{CHCl}_3$ ).

| Degrees | H1a  | H1b  | H2   | H3   | H4   | H5   | H6a  | H6b  |
|---------|------|------|------|------|------|------|------|------|
| 0       | 5.53 | 5.94 | 6.55 | 5.85 | 6.40 | 7.55 | 5.59 | 5.66 |
| 10      | 5.56 | 5.88 | 6.57 | 5.96 | 6.48 | 7.50 | 5.55 | 5.68 |
| 20      | 5.60 | 5.78 | 6.57 | 6.04 | 6.51 | 7.46 | 5.50 | 5.68 |
| 30      | 5.62 | 5.69 | 6.58 | 6.11 | 6.52 | 7.43 | 5.45 | 5.65 |
| 40      | 5.62 | 5.60 | 6.59 | 6.18 | 6.51 | 7.41 | 5.40 | 5.62 |
| 50      | 5.60 | 5.52 | 6.59 | 6.24 | 6.49 | 7.36 | 5.36 | 5.59 |
| 60      | 5.58 | 5.45 | 6.63 | 6.29 | 6.47 | 7.30 | 5.34 | 5.56 |
| 70      | 5.55 | 5.40 | 6.68 | 6.32 | 6.45 | 7.22 | 5.32 | 5.53 |
| 80      | 5.54 | 5.37 | 6.72 | 6.35 | 6.43 | 7.12 | 5.32 | 5.50 |
| 90      | 5.54 | 5.34 | 6.81 | 6.41 | 6.43 | 7.04 | 5.33 | 5.49 |
| 100     | 5.55 | 5.33 | 6.91 | 6.47 | 6.42 | 6.97 | 5.34 | 5.48 |
| 110     | 5.55 | 5.35 | 7.01 | 6.52 | 6.42 | 6.95 | 5.36 | 5.47 |
| 120     | 5.53 | 5.37 | 7.13 | 6.52 | 6.40 | 7.01 | 5.37 | 5.47 |
| 130     | 5.49 | 5.41 | 7.20 | 6.47 | 6.38 | 7.10 | 5.37 | 5.47 |
| 140     | 5.46 | 5.44 | 7.28 | 6.43 | 6.36 | 7.19 | 5.38 | 5.48 |
| 150     | 5.43 | 5.47 | 7.33 | 6.39 | 6.35 | 7.25 | 5.39 | 5.50 |
| 160     | 5.41 | 5.49 | 7.36 | 6.36 | 6.34 | 7.29 | 5.40 | 5.51 |
| 170     | 5.41 | 5.52 | 7.35 | 6.33 | 6.33 | 7.31 | 5.41 | 5.52 |
| 180     | 5.42 | 5.52 | 7.32 | 6.32 | 6.32 | 7.32 | 5.41 | 5.52 |

**Table S6.** Effect of variation of the torsion angle  $\phi(\text{C}_1\text{C}_2\text{C}_3\text{C}_4)$  of (Z)-1.3.5-hexatriene, on calculated  $^1\text{H}$ -NMR chemical shifts at the same level of theory as geometry optimization (APFD/6-311++G(d,p) with CPCM in  $\text{CHCl}_3$ ).

| Degrees | H1a  | H1b  | H2   | H3   | H4   | H5   | H6a  | H6b  |
|---------|------|------|------|------|------|------|------|------|
| 0       | 5.74 | 6.20 | 6.66 | 5.96 | 6.57 | 7.79 | 5.76 | 5.81 |
| 10      | 5.79 | 6.11 | 6.72 | 6.12 | 6.70 | 7.68 | 5.72 | 5.86 |
| 20      | 5.83 | 5.99 | 6.72 | 6.21 | 6.72 | 7.61 | 5.65 | 5.86 |
| 30      | 5.84 | 5.88 | 6.71 | 6.30 | 6.71 | 7.55 | 5.59 | 5.84 |
| 40      | 5.84 | 5.78 | 6.71 | 6.37 | 6.68 | 7.51 | 5.54 | 5.80 |
| 50      | 5.82 | 5.70 | 6.72 | 6.43 | 6.65 | 7.46 | 5.51 | 5.76 |
| 60      | 5.79 | 5.63 | 6.75 | 6.47 | 6.62 | 7.41 | 5.48 | 5.72 |
| 70      | 5.76 | 5.58 | 6.80 | 6.50 | 6.59 | 7.33 | 5.47 | 5.69 |
| 80      | 5.75 | 5.55 | 6.85 | 6.52 | 6.55 | 7.22 | 5.46 | 5.65 |
| 90      | 5.74 | 5.51 | 6.92 | 6.56 | 6.54 | 7.16 | 5.48 | 5.64 |
| 100     | 5.75 | 5.51 | 7.01 | 6.60 | 6.54 | 7.10 | 5.50 | 5.64 |
| 110     | 5.76 | 5.52 | 7.14 | 6.64 | 6.52 | 7.07 | 5.51 | 5.63 |
| 120     | 5.72 | 5.55 | 7.26 | 6.64 | 6.51 | 7.14 | 5.53 | 5.64 |
| 130     | 5.71 | 5.58 | 7.33 | 6.59 | 6.49 | 7.22 | 5.53 | 5.65 |
| 140     | 5.66 | 5.63 | 7.41 | 6.54 | 6.48 | 7.32 | 5.55 | 5.67 |
| 150     | 5.62 | 5.66 | 7.46 | 6.50 | 6.47 | 7.39 | 5.55 | 5.68 |
| 160     | 5.60 | 5.69 | 7.48 | 6.53 | 6.46 | 7.42 | 5.56 | 5.68 |
| 170     | 5.58 | 5.70 | 7.49 | 5.44 | 6.44 | 7.46 | 5.56 | 5.67 |
| 180     | 5.57 | 5.68 | 7.47 | 6.44 | 6.44 | 7.47 | 5.57 | 5.68 |

**Table S7.** Effect of variation of the C<sub>2</sub>C<sub>3</sub>C<sub>4</sub>C<sub>5</sub> torsion angle of (*E,Z,E*)-2.4.6-octatriene on calculated <sup>1</sup>H-NMR chemical shifts (at the GIAO/B3LYP/6-311+G(2d,p) level of theory with CPCM in CHCl<sub>3</sub>).

| Degrees | H1   | H2   | H3   | H4   | H5   | H6   | H7   | H8   |
|---------|------|------|------|------|------|------|------|------|
| 0       | 1.94 | 6.67 | 6.17 | 5.52 | 6.14 | 7.13 | 6.22 | 1.97 |
| 10      | 1.94 | 6.61 | 6.18 | 5.60 | 6.27 | 7.07 | 6.23 | 1.97 |
| 20      | 1.94 | 6.48 | 6.16 | 5.70 | 6.29 | 7.03 | 6.23 | 1.95 |
| 30      | 1.94 | 6.35 | 6.17 | 5.77 | 6.30 | 7.00 | 6.21 | 1.93 |
| 40      | 1.93 | 6.21 | 6.16 | 5.83 | 6.31 | 6.96 | 6.18 | 1.91 |
| 50      | 1.91 | 6.09 | 6.15 | 5.90 | 6.31 | 6.92 | 6.15 | 1.89 |
| 60      | 1.88 | 6.01 | 6.21 | 5.95 | 6.31 | 6.89 | 6.13 | 1.88 |
| 70      | 1.87 | 5.93 | 6.23 | 6.00 | 6.31 | 6.82 | 6.10 | 1.87 |
| 80      | 1.87 | 5.85 | 6.25 | 6.04 | 6.32 | 6.72 | 6.08 | 1.86 |
| 90      | 1.85 | 5.84 | 6.36 | 6.12 | 6.32 | 6.67 | 6.07 | 1.86 |
| 100     | 1.85 | 5.85 | 6.46 | 6.18 | 6.31 | 6.61 | 6.07 | 1.87 |
| 110     | 1.86 | 5.85 | 6.56 | 6.22 | 6.29 | 6.59 | 6.06 | 1.88 |
| 120     | 1.86 | 5.92 | 6.70 | 6.22 | 6.23 | 6.66 | 6.06 | 1.89 |
| 130     | 1.89 | 5.93 | 6.76 | 6.17 | 6.19 | 6.74 | 6.06 | 1.90 |
| 140     | 1.90 | 5.98 | 6.86 | 6.12 | 6.17 | 6.83 | 6.06 | 1.91 |
| 150     | 1.90 | 6.03 | 6.94 | 6.09 | 6.14 | 6.89 | 6.05 | 1.92 |
| 160     | 1.91 | 6.06 | 6.97 | 6.08 | 6.11 | 6.90 | 6.04 | 1.92 |
| 170     | 1.92 | 6.09 | 6.97 | 6.04 | 6.05 | 6.90 | 6.04 | 1.93 |
| 180     | 1.93 | 6.07 | 6.91 | 6.03 | 6.03 | 6.91 | 6.07 | 1.93 |

**Table S8.** Effect of variation of the C<sub>2</sub>C<sub>3</sub>C<sub>4</sub>C<sub>5</sub> torsion angle of (*E,Z,E*)-2.4.6-octatriene, on calculated <sup>1</sup>H-NMR chemical shifts at the same level of theory as geometry optimization (APFD/6-311++G(d,p) with CPCM in CHCl<sub>3</sub>).

| Degrees | H1   | H2   | H3   | H4   | H5   | H6   | H7   | H8   |
|---------|------|------|------|------|------|------|------|------|
| 0       | 1.94 | 6.87 | 6.31 | 5.63 | 6.31 | 7.37 | 6.30 | 2.01 |
| 10      | 1.99 | 6.80 | 6.34 | 5.79 | 6.46 | 7.27 | 6.35 | 2.01 |
| 20      | 2.00 | 6.65 | 6.31 | 5.89 | 6.49 | 7.20 | 6.36 | 1.98 |
| 30      | 2.00 | 6.49 | 6.31 | 5.97 | 6.49 | 7.13 | 6.34 | 1.96 |
| 40      | 1.99 | 6.36 | 6.29 | 6.04 | 6.49 | 7.09 | 6.30 | 1.93 |
| 50      | 1.98 | 6.23 | 6.30 | 6.10 | 6.47 | 7.05 | 6.27 | 1.92 |
| 60      | 1.94 | 6.12 | 6.33 | 6.15 | 6.47 | 7.04 | 6.24 | 1.91 |
| 70      | 1.92 | 6.03 | 6.36 | 6.17 | 6.46 | 6.96 | 6.21 | 1.90 |
| 80      | 1.93 | 5.96 | 6.41 | 6.19 | 6.44 | 6.87 | 6.19 | 1.89 |
| 90      | 1.91 | 5.94 | 6.48 | 6.24 | 6.44 | 6.83 | 6.18 | 1.90 |
| 100     | 1.90 | 5.95 | 6.58 | 6.29 | 6.43 | 6.76 | 6.18 | 1.91 |
| 110     | 1.92 | 5.96 | 6.70 | 6.33 | 6.40 | 6.73 | 6.18 | 1.92 |
| 120     | 1.90 | 6.02 | 6.83 | 6.34 | 6.36 | 6.78 | 6.19 | 1.94 |
| 130     | 1.94 | 6.06 | 6.91 | 6.29 | 6.32 | 6.86 | 6.19 | 1.94 |
| 140     | 1.95 | 6.11 | 7.01 | 6.24 | 6.29 | 6.94 | 6.20 | 1.96 |
| 150     | 1.95 | 6.15 | 7.08 | 6.21 | 6.26 | 7.01 | 6.19 | 1.96 |
| 160     | 1.97 | 6.19 | 7.10 | 6.18 | 6.23 | 7.03 | 6.16 | 1.96 |
| 170     | 1.97 | 6.23 | 7.12 | 6.14 | 6.18 | 7.06 | 6.14 | 1.95 |
| 180     | 1.95 | 6.14 | 7.08 | 6.18 | 6.18 | 7.08 | 6.14 | 1.95 |



**Table S9.** Effect of variation of the C<sub>1</sub>C<sub>2</sub>C<sub>3</sub>C<sub>4</sub> torsion angle of (*E*)-1,3,5-hexatriene on calculated <sup>1</sup>H-NMR chemical shifts (at the GIAO/B3LYP/6-311+G(2d,p) level with CPCM in CHCl<sub>3</sub>).

| Degrees | H1a  | H1b  | H2   | H3   | H4   | H5   | H6a  | H6b  |
|---------|------|------|------|------|------|------|------|------|
| 0       | 5.33 | 6.08 | 6.55 | 6.30 | 7.30 | 6.87 | 5.31 | 5.54 |
| 10      | 5.31 | 6.04 | 6.57 | 6.32 | 7.24 | 6.85 | 5.33 | 5.54 |
| 20      | 5.28 | 5.94 | 6.62 | 6.37 | 7.12 | 6.81 | 5.35 | 5.54 |
| 30      | 5.25 | 5.80 | 6.68 | 6.44 | 6.97 | 6.79 | 5.35 | 5.54 |
| 40      | 5.24 | 5.66 | 6.74 | 6.50 | 6.81 | 6.78 | 5.34 | 5.52 |
| 50      | 5.25 | 5.54 | 6.79 | 6.55 | 6.68 | 6.77 | 5.33 | 5.50 |
| 60      | 5.28 | 5.43 | 6.82 | 6.58 | 6.57 | 6.76 | 5.32 | 5.48 |
| 70      | 5.31 | 5.36 | 6.84 | 6.59 | 6.48 | 6.75 | 5.32 | 5.47 |
| 80      | 5.36 | 5.32 | 6.88 | 6.62 | 6.43 | 6.75 | 5.31 | 5.45 |
| 90      | 5.42 | 5.29 | 6.93 | 6.68 | 6.41 | 6.75 | 5.30 | 5.44 |
| 100     | 5.47 | 5.31 | 6.95 | 6.74 | 6.38 | 6.75 | 5.29 | 5.43 |
| 110     | 5.51 | 5.31 | 6.98 | 6.79 | 6.41 | 6.79 | 5.30 | 5.42 |
| 120     | 5.48 | 5.34 | 6.95 | 6.75 | 6.41 | 6.77 | 5.31 | 5.42 |
| 130     | 5.44 | 5.37 | 6.95 | 6.72 | 6.44 | 6.78 | 5.33 | 5.44 |
| 140     | 5.40 | 5.42 | 6.92 | 6.69 | 6.50 | 6.79 | 5.34 | 5.46 |
| 150     | 5.38 | 5.45 | 6.86 | 6.67 | 6.56 | 6.81 | 5.35 | 5.48 |
| 160     | 5.37 | 5.48 | 6.83 | 6.66 | 6.62 | 6.85 | 5.34 | 5.50 |
| 170     | 5.35 | 5.50 | 6.87 | 6.67 | 6.66 | 6.89 | 5.34 | 5.51 |
| 180     | 5.34 | 5.51 | 6.91 | 6.67 | 6.67 | 6.91 | 5.34 | 5.51 |

**Table S10.** Effect of variation of the C<sub>1</sub>C<sub>2</sub>C<sub>3</sub>C<sub>4</sub> torsion angle of (*E*)-1,3,5-hexatriene, on calculated <sup>1</sup>H-NMR chemical shifts at the same level of theory as geometry optimization (APFD/6-311++G(d,p) with CPCM in CHCl<sub>3</sub>)

| Degrees | H1a  | H1b  | H2   | H3   | H4   | H5   | H6a  | H6b  |
|---------|------|------|------|------|------|------|------|------|
| 0       | 5.53 | 6.26 | 6.63 | 6.40 | 7.42 | 6.97 | 5.48 | 5.73 |
| 10      | 5.51 | 6.23 | 6.66 | 6.42 | 7.37 | 6.96 | 5.50 | 5.74 |
| 20      | 5.48 | 6.13 | 6.74 | 6.49 | 7.26 | 6.95 | 5.51 | 5.73 |
| 30      | 5.44 | 5.99 | 6.81 | 6.57 | 7.10 | 6.95 | 5.50 | 5.71 |
| 40      | 5.44 | 5.84 | 6.87 | 6.64 | 6.94 | 6.94 | 5.49 | 5.69 |
| 50      | 5.45 | 5.70 | 6.93 | 6.68 | 6.79 | 6.93 | 5.48 | 5.67 |
| 60      | 5.48 | 5.59 | 6.96 | 6.71 | 6.67 | 6.92 | 5.47 | 5.65 |
| 70      | 5.52 | 5.52 | 6.97 | 6.74 | 6.58 | 6.90 | 5.46 | 5.63 |
| 80      | 5.54 | 5.49 | 7.00 | 6.76 | 6.53 | 6.90 | 5.46 | 5.61 |
| 90      | 5.59 | 5.47 | 7.04 | 6.81 | 6.51 | 6.90 | 5.45 | 5.60 |
| 100     | 5.68 | 5.47 | 7.06 | 6.85 | 6.49 | 6.90 | 5.44 | 5.59 |
| 110     | 5.72 | 5.49 | 7.08 | 6.88 | 6.48 | 6.91 | 5.46 | 5.59 |
| 120     | 5.70 | 5.50 | 7.06 | 6.88 | 6.53 | 6.91 | 5.47 | 5.59 |
| 130     | 5.62 | 5.56 | 7.06 | 6.85 | 6.58 | 6.92 | 5.48 | 5.62 |
| 140     | 5.57 | 5.61 | 7.03 | 6.82 | 6.62 | 6.93 | 5.49 | 5.64 |
| 150     | 5.56 | 5.64 | 6.99 | 6.79 | 6.67 | 6.95 | 5.50 | 5.66 |
| 160     | 5.56 | 5.65 | 6.97 | 6.77 | 6.71 | 6.97 | 5.51 | 5.68 |
| 170     | 5.52 | 5.67 | 6.99 | 6.74 | 6.73 | 7.00 | 5.51 | 5.69 |
| 180     | 5.50 | 5.68 | 7.01 | 6.73 | 6.73 | 7.01 | 5.50 | 5.68 |

**Table S11.** Effect of variation of the C<sub>2</sub>C<sub>3</sub>C<sub>4</sub>C<sub>5</sub> torsion angle of (*E.E.E*)-2,4,6-octatriene on calculated <sup>1</sup>H-NMR chemical shifts (at the GIAO/B3LYP/6-311+G(2d,p) level with CPCM in CCl<sub>4</sub>).

| Degrees | H1   | H2   | H3   | H4   | H5   | H6   | H7   | H8   |
|---------|------|------|------|------|------|------|------|------|
| 0       | 1.86 | 6.56 | 6.13 | 5.96 | 6.93 | 6.44 | 6.04 | 1.87 |
| 10      | 1.85 | 6.45 | 6.16 | 6.07 | 6.84 | 6.40 | 6.04 | 1.87 |
| 20      | 1.84 | 6.31 | 6.20 | 6.16 | 6.73 | 6.37 | 6.03 | 1.87 |
| 30      | 1.83 | 6.16 | 6.26 | 6.23 | 6.60 | 6.34 | 6.02 | 1.86 |
| 40      | 1.82 | 6.03 | 6.31 | 6.25 | 6.49 | 6.33 | 6.00 | 1.85 |
| 50      | 1.81 | 5.93 | 6.33 | 6.26 | 6.40 | 6.33 | 5.98 | 1.85 |
| 60      | 1.80 | 5.86 | 6.33 | 6.26 | 6.32 | 6.32 | 5.97 | 1.85 |
| 70      | 1.78 | 5.82 | 6.39 | 6.30 | 6.29 | 6.32 | 5.97 | 1.85 |
| 80      | 1.74 | 5.83 | 6.50 | 6.38 | 6.29 | 6.33 | 5.97 | 1.85 |
| 90      | 1.79 | 5.79 | 6.45 | 6.42 | 6.25 | 6.36 | 5.97 | 1.84 |
| 100     | 1.77 | 5.84 | 6.57 | 6.50 | 6.22 | 6.33 | 5.97 | 1.84 |
| 110     | 1.83 | 5.80 | 6.47 | 6.52 | 6.26 | 6.40 | 5.98 | 1.84 |
| 120     | 1.81 | 5.89 | 6.52 | 6.44 | 6.27 | 6.41 | 5.96 | 1.85 |
| 130     | 1.82 | 5.96 | 6.51 | 6.42 | 6.31 | 6.40 | 5.97 | 1.85 |
| 140     | 1.85 | 5.93 | 6.40 | 6.44 | 6.39 | 6.41 | 5.98 | 1.86 |
| 150     | 1.86 | 5.93 | 6.35 | 6.47 | 6.47 | 6.42 | 6.00 | 1.86 |
| 160     | 1.85 | 5.97 | 6.39 | 6.51 | 6.53 | 6.44 | 5.99 | 1.85 |
| 170     | 1.86 | 5.98 | 6.45 | 6.55 | 6.55 | 6.45 | 5.98 | 1.85 |
| 180     | 1.86 | 6.56 | 6.13 | 5.96 | 6.93 | 6.44 | 6.04 | 1.87 |

**Table S12.** Effect of variation of the C<sub>2</sub>C<sub>3</sub>C<sub>4</sub>C<sub>5</sub> torsion angle of (*E.E.E*)-2,4,6-octatriene, on calculated <sup>1</sup>H-NMR chemical shifts at the same level of theory as geometry optimization (APFD/6-311++G(d,p) with CPCM in CCl<sub>4</sub>).

| Degrees | H1   | H2   | H3   | H4   | H5   | H6   | H7   | H8   |
|---------|------|------|------|------|------|------|------|------|
| 0       | 1.87 | 6.70 | 6.22 | 6.03 | 7.12 | 6.52 | 6.13 | 1.89 |
| 10      | 1.91 | 6.67 | 6.26 | 6.09 | 7.06 | 6.56 | 6.15 | 1.91 |
| 20      | 1.90 | 6.57 | 6.29 | 6.18 | 6.97 | 6.55 | 6.16 | 1.91 |
| 30      | 1.89 | 6.44 | 6.34 | 6.27 | 6.85 | 6.53 | 6.16 | 1.90 |
| 40      | 1.88 | 6.28 | 6.40 | 6.33 | 6.72 | 6.51 | 6.14 | 1.89 |
| 50      | 1.87 | 6.14 | 6.46 | 6.36 | 6.60 | 6.49 | 6.11 | 1.88 |
| 60      | 1.87 | 6.03 | 6.47 | 6.37 | 6.50 | 6.48 | 6.10 | 1.88 |
| 70      | 1.86 | 5.97 | 6.45 | 6.39 | 6.42 | 6.47 | 6.09 | 1.87 |
| 80      | 1.83 | 5.94 | 6.48 | 6.42 | 6.39 | 6.47 | 6.08 | 1.87 |
| 90      | 1.78 | 5.93 | 6.57 | 6.47 | 6.40 | 6.49 | 6.08 | 1.88 |
| 100     | 1.84 | 5.90 | 6.57 | 6.51 | 6.37 | 6.51 | 6.06 | 1.87 |
| 110     | 1.81 | 5.94 | 6.65 | 6.60 | 6.35 | 6.49 | 6.07 | 1.87 |
| 120     | 1.89 | 5.94 | 6.61 | 6.60 | 6.33 | 6.48 | 6.07 | 1.89 |
| 130     | 1.86 | 5.98 | 6.62 | 6.58 | 6.38 | 6.51 | 6.07 | 1.89 |
| 140     | 1.86 | 6.04 | 6.61 | 6.56 | 6.40 | 6.50 | 6.08 | 1.89 |
| 150     | 1.90 | 6.04 | 6.55 | 6.55 | 6.44 | 6.50 | 6.10 | 1.89 |
| 160     | 1.91 | 6.05 | 6.51 | 6.54 | 6.49 | 6.51 | 6.13 | 1.90 |
| 170     | 1.89 | 6.11 | 6.52 | 6.51 | 6.50 | 6.52 | 6.14 | 1.90 |
| 180     | 1.90 | 6.13 | 6.54 | 6.48 | 6.48 | 6.54 | 6.13 | 1.90 |

**Table S13.** Calculated ( $\delta_{\text{calc}}$ , ppm) and experimental ( $\delta_{\text{exp}}$ , ppm)  $^1\text{H}$ -NMR chemical shifts of the 9,11,13-conjugated fatty acid geometric isomers with geometry optimization at the B3LYP/6-31+G(d) and APFD/6-31+G(d) level.

| Compound                                                                          | Atom | $\delta_{\text{exp.}}$<br>(ppm) <sup>a</sup> | B3LYP/6-31+G(d)<br>$\delta_{\text{calc}}$ (ppm) <sup>b</sup> | APFD/6-31+G(d)<br>$\delta_{\text{calc}}$ (ppm) <sup>b</sup> |
|-----------------------------------------------------------------------------------|------|----------------------------------------------|--------------------------------------------------------------|-------------------------------------------------------------|
| 9 <i>E</i> ,11 <i>E</i> ,13 <i>E</i><br>Isomer<br>( $\beta$ -Eleostearic<br>acid) | H11  | 6.10                                         | 6.43                                                         | 6.40                                                        |
|                                                                                   | H12  | 6.10                                         | 6.43                                                         | 6.39                                                        |
|                                                                                   | H10  | 6.04                                         | 6.42                                                         | 6.42                                                        |
|                                                                                   | H13  | 6.04                                         | 6.43                                                         | 6.46                                                        |
|                                                                                   | H9   | 5.66                                         | 6.02                                                         | 6.05                                                        |
|                                                                                   | H14  | 5.66                                         | 6.04                                                         | 6.07                                                        |
|                                                                                   | H2   | 2.37                                         | 2.47                                                         | 2.48                                                        |
|                                                                                   | H8   | 2.10                                         | 2.13                                                         | 2.15                                                        |
|                                                                                   | H15  | 2.10                                         | 2.13                                                         | 2.14                                                        |
|                                                                                   | H3   | 1.65                                         | 1.48                                                         | 1.51                                                        |
|                                                                                   | H4   | 1.39                                         | 1.24                                                         | 1.25                                                        |
|                                                                                   | H5   | 1.39                                         | 1.31                                                         | 1.33                                                        |
|                                                                                   | H6   | 1.39                                         | 1.30                                                         | 1.32                                                        |
|                                                                                   | H7   | 1.39                                         | 1.28                                                         | 1.29                                                        |
|                                                                                   | H16  | 1.33                                         | 1.23                                                         | 1.24                                                        |
|                                                                                   | H17  | 1.33                                         | 1.36                                                         | 1.37                                                        |
|                                                                                   | H18  | 0.91                                         | 0.93                                                         | 0.96                                                        |
| 9 <i>Z</i> ,11 <i>E</i> ,13 <i>E</i><br>Isomer<br>( $\beta$ -Eleostearic<br>acid) | H11  | 6.19                                         | 6.82                                                         | 6.86                                                        |
|                                                                                   | H12  | 6.40                                         | 6.54                                                         | 6.56                                                        |
|                                                                                   | H10  | 6.01                                         | 6.33                                                         | 6.38                                                        |
|                                                                                   | H13  | 6.12                                         | 6.62                                                         | 6.66                                                        |
|                                                                                   | H9   | 5.4                                          | 5.73                                                         | 5.77                                                        |
|                                                                                   | H14  | 5.74                                         | 6.10                                                         | 6.12                                                        |
|                                                                                   | H2   | 2.40                                         | 2.48                                                         | 2.51                                                        |
|                                                                                   | H8   | 2.20                                         | 2.26                                                         | 2.27                                                        |
|                                                                                   | H15  | 2.20                                         | 2.10                                                         | 2.11                                                        |
|                                                                                   | H3   | 1.64                                         | 1.48                                                         | 1.50                                                        |
|                                                                                   | H4   | 1.41                                         | 1.25                                                         | 1.26                                                        |
|                                                                                   | H5   | 1.41                                         | 1.32                                                         | 1.34                                                        |
|                                                                                   | H6   | 1.41                                         | 1.36                                                         | 1.37                                                        |
|                                                                                   | H7   | 1.41                                         | 1.26                                                         | 1.25                                                        |
|                                                                                   | H16  | 1.33                                         | 1.27                                                         | 1.28                                                        |
|                                                                                   | H17  | 1.33                                         | 1.36                                                         | 1.37                                                        |
|                                                                                   | H18  | 0.97                                         | 0.97                                                         | 0.98                                                        |
| 9 <i>Z</i> ,11 <i>E</i> ,13 <i>Z</i><br>Isomer<br>(Punicic acid)                  | H11  | 6.48                                         | 6.85                                                         | 6.95                                                        |
|                                                                                   | H12  | 6.48                                         | 6.84                                                         | 6.92                                                        |
|                                                                                   | H10  | 6.08                                         | 6.36                                                         | 6.40                                                        |
|                                                                                   | H13  | 6.08                                         | 6.41                                                         | 6.42                                                        |
|                                                                                   | H9   | 5.46                                         | 5.81                                                         | 5.82                                                        |
|                                                                                   | H14  | 5.46                                         | 5.77                                                         | 5.82                                                        |
|                                                                                   | H2   | 2.37                                         | 2.49                                                         | 2.50                                                        |
|                                                                                   | H8   | 2.22                                         | 2.30                                                         | 2.29                                                        |
|                                                                                   | H15  | 2.22                                         | 2.29                                                         | 2.29                                                        |
|                                                                                   | H3   | 1.65                                         | 1.50                                                         | 1.51                                                        |
|                                                                                   | H4   | 1.39                                         | 1.25                                                         | 1.26                                                        |
|                                                                                   | H5   | 1.39                                         | 1.32                                                         | 1.32                                                        |
|                                                                                   | H6   | 1.39                                         | 1.35                                                         | 1.37                                                        |
|                                                                                   | H7   | 1.39                                         | 1.29                                                         | 1.27                                                        |

|     |      |      |      |
|-----|------|------|------|
| H16 | 1.32 | 1.24 | 1.22 |
| H17 | 1.32 | 1.41 | 1.42 |
| H18 | 0.94 | 0.97 | 0.98 |

<sup>a</sup> Ref. [18]; <sup>b</sup> at the GIAO/B3LYP/6-311+G(2d,p) level with CPCM.

**Table S14.** Statistical analysis of the data of Figure S12 and Table S13.

|         | <b>R<sup>2</sup></b> | <b>Slope</b> | <b>Intercept</b> |
|---------|----------------------|--------------|------------------|
| (A) (a) | 0.922                | 1.008        | 0.312            |
| (A) (b) | 0.910                | 1.028        | 0.219            |
| (B) (a) | 0.982                | 1.038        | 0.133            |
| (B) (b) | 0.972                | 1.061        | 0.024            |

**Table S15.** Calculated ( $\delta_{\text{calc}}$ , ppm) and experimental ( $\delta_{\text{exp}}$ , ppm) <sup>1</sup>H-NMR chemical shifts of the 10,12,14-conjugated hexadecatrienyl acetate geometric isomers with geometry optimization at the B3LYP/6-31+G(d) and APFD/6-31+G(d) level.

| <b>Compound</b>                                                | <b>Atom</b> | <b><math>\delta_{\text{exp}}</math><br/>(ppm)<sup>a</sup></b> | <b>B3LYP/6-31+G(d)<br/><math>\delta_{\text{calc}}</math> (ppm)<sup>b</sup></b> | <b>APFD/6-31+G(d)<br/><math>\delta_{\text{calc}}</math> (ppm)<sup>b</sup></b> |
|----------------------------------------------------------------|-------------|---------------------------------------------------------------|--------------------------------------------------------------------------------|-------------------------------------------------------------------------------|
| 10 <i>E</i> ,12 <i>E</i> ,14 <i>Z</i> -Hexadecatrienyl acetate | H9          | 2.09                                                          | 2.16                                                                           | 2.16                                                                          |
|                                                                | H10         | 5.70                                                          | 6.13                                                                           | 6.16                                                                          |
|                                                                | H11         | 6.10                                                          | 6.49                                                                           | 6.50                                                                          |
|                                                                | H12         | 6.18                                                          | 6.66                                                                           | 6.69                                                                          |
|                                                                | H13         | 6.41                                                          | 6.84                                                                           | 6.89                                                                          |
|                                                                | H14         | 6.02                                                          | 6.34                                                                           | 6.35                                                                          |
|                                                                | H15         | 5.47                                                          | 5.69                                                                           | 5.71                                                                          |
|                                                                | H16         | 1.76                                                          | 1.92                                                                           | 1.93                                                                          |
| 10 <i>E</i> ,12 <i>Z</i> ,14 <i>Z</i> -Hexadecatrienyl acetate | H9          | 2.12                                                          | 2.21                                                                           | 2.22                                                                          |
|                                                                | H10         | 5.74                                                          | 6.07                                                                           | 6.11                                                                          |
|                                                                | H11         | 6.50                                                          | 6.83                                                                           | 6.88                                                                          |
|                                                                | H12         | 5.98                                                          | 6.28                                                                           | 6.30                                                                          |
|                                                                | H13         | 6.16                                                          | 6.51                                                                           | 6.54                                                                          |
|                                                                | H14         | 6.46                                                          | 6.75                                                                           | 6.79                                                                          |
|                                                                | H15         | 5.56                                                          | 5.90                                                                           | 5.90                                                                          |
|                                                                | H16         | 1.77                                                          | 1.90                                                                           | 1.90                                                                          |
| 10 <i>Z</i> ,12 <i>Z</i> ,14 <i>E</i> -Hexadecatrienyl acetate | H9          | 2.18                                                          | 2.25                                                                           | 2.27                                                                          |
|                                                                | H10         | 5.48                                                          | 5.79                                                                           | 5.84                                                                          |
|                                                                | H11         | 6.43                                                          | 6.92                                                                           | 6.97                                                                          |
|                                                                | H12         | 6.13                                                          | 6.44                                                                           | 6.45                                                                          |
|                                                                | H13         | 5.96                                                          | 6.07                                                                           | 6.10                                                                          |
|                                                                | H14         | 6.52                                                          | 6.92                                                                           | 7.07                                                                          |
|                                                                | H15         | 5.75                                                          | 6.15                                                                           | 6.15                                                                          |
|                                                                | H16         | 1.80                                                          | 1.93                                                                           | 1.94                                                                          |
| 10 <i>Z</i> ,12 <i>E</i> ,14 <i>E</i> -Hexadecatrienyl acetate | H9          | 2.17                                                          | 2.31                                                                           | 2.30                                                                          |
|                                                                | H10         | 5.40                                                          | 5.79                                                                           | 5.77                                                                          |
|                                                                | H11         | 5.98                                                          | 6.27                                                                           | 6.38                                                                          |
|                                                                | H12         | 6.37                                                          | 6.77                                                                           | 6.89                                                                          |
|                                                                | H13         | 6.16                                                          | 6.50                                                                           | 6.50                                                                          |
|                                                                | H14         | 6.07                                                          | 6.57                                                                           | 6.70                                                                          |

|  |     |      |      |      |
|--|-----|------|------|------|
|  | H15 | 5.70 | 6.04 | 6.11 |
|  | H16 | 1.77 | 1.90 | 1.90 |

<sup>a</sup> Ref. [13]; <sup>b</sup> at the GIAO/B3LYP/6-311+G(2d,p) level with CPCM.

**Table S16.** Statistical analysis of the data of Figure S13 and Table S15.

|         | <b>R<sup>2</sup></b> | <b>Slope</b> | <b>Intercept</b> |
|---------|----------------------|--------------|------------------|
| (A) (a) | 0.949                | 1.067        | -0.046           |
| (A) (b) | 0.938                | 1.121        | -0.333           |
| (B) (a) | 0.965                | 1.075        | -0.096           |
| (B) (b) | 0.956                | 1.132        | -0.395           |

**Table S17.** Calculated shielding values of the reference TMS molecule: (A) at the GIAO/B3LYP/6-311+G(2d,p)/CPCM level with energy minimization in the gas using a variety of functionals and basis sets, and (B) at the GIAO with the same level of theory as geometry optimization.

| Minimization Method<br>(Gas Phase) | (A)                       |                          | (B)                       |                          |
|------------------------------------|---------------------------|--------------------------|---------------------------|--------------------------|
|                                    | (CPCM/CHCl <sub>3</sub> ) | (CPCM=CCl <sub>4</sub> ) | (CPCM/CHCl <sub>3</sub> ) | (CPCM=CCl <sub>4</sub> ) |
| B3LYP/6-31+G(d)                    | 31.79                     | 31.79                    | 32.07                     | 32.07                    |
| B3LYP/6-311++G(d,p)                | 31.90                     | 31.90                    | 31.97                     | 31.97                    |
| B3LYP-D3/6-31+G(d)                 | 31.81                     | 31.81                    | 32.08                     | 32.08                    |
| B3LYP-D3/6-311++G(d,p)             | 31.91                     | 31.91                    | 31.99                     | 31.99                    |
| M06-2X/6-31+G(d)                   | 31.87                     | 31.86                    | 32.18                     | 32.18                    |
| M06-2X /6-311++G(d,p)              | 31.96                     | 31.96                    | 32.08                     | 32.08                    |
| APFD/6-31+G(d)                     | 31.83                     | 31.83                    | 32.01                     | 32.01                    |
| APFD/6-311++G(d,p)                 | 31.93                     | 31.91                    | 31.83                     | 31.83                    |
| $\omega$ B97XD/6-31+G(d)           | 31.84                     | 31.84                    | 32.12                     | 32.12                    |
| $\omega$ B97XD /6-311++G(d,p)      | 31.93                     | 31.93                    | 31.96                     | 31.96                    |
| PBE0/6-31+G(d)                     | 31.83                     | 31.83                    | 32.08                     | 31.99                    |
| PBE0/6-311++G(d,p)                 | 31.91                     | 31.91                    | 31.80                     | 31.80                    |
